# Supplementary material for: Monitoring SARS-CoV-2 incidence and seroconversion among university students and employees: a longitudinal cohort study in California, June–August 2020
Source: PubMed Central journal article supplement — BMJ Open. 2023 Apr 6;13(4):e063999. doi: 10.1136/bmjopen-2022-063999 (PMC10083519; doi:10.1136/bmjopen-2022-063999), 2023-04-06
Supplement: bmjopen-2022-063999.draft_revisions.pdf [file bmjopen-2022-063999.draft_revisions.pdf]

# BMJ Open

BMJ Open is committed to open peer review. As part of this commitment we make the peer review history of every article we publish publicly available.

When an article is published we post the peer reviewers' comments and the authors' responses online. We also post the versions of the paper that were used during peer review. These are the versions that the peer review comments apply to.

The versions of the paper that follow are the versions that were submitted during the peer review process. They are not the versions of record or the final published versions. They should not be cited or distributed as the published version of this manuscript.

BMJ Open is an open access journal and the full, final, typeset and author-corrected version of record of the manuscript is available on our site with no access controls, subscription charges or pay-per-view fees (<http://bmjopen.bmj.com>).

If you have any questions on BMJ Open's open peer review process please email [info.bmjopen@bmj.com](mailto:info.bmjopen@bmj.com)

# BMJ Open

## Monitoring SARS-CoV-2 incidence and seroconversion in a university cohort in California, June to August 2020

|                               |                                                                                                                                                                                                                                                                                                                                                                                                                                                                                                                                                                                                                                                                                                                                                                                                                                                                                                                                                                                                                                                 |
|-------------------------------|-------------------------------------------------------------------------------------------------------------------------------------------------------------------------------------------------------------------------------------------------------------------------------------------------------------------------------------------------------------------------------------------------------------------------------------------------------------------------------------------------------------------------------------------------------------------------------------------------------------------------------------------------------------------------------------------------------------------------------------------------------------------------------------------------------------------------------------------------------------------------------------------------------------------------------------------------------------------------------------------------------------------------------------------------|
| Journal:                      | <i>BMJ Open</i>                                                                                                                                                                                                                                                                                                                                                                                                                                                                                                                                                                                                                                                                                                                                                                                                                                                                                                                                                                                                                                 |
| Manuscript ID                 | bmjopen-2022-063999                                                                                                                                                                                                                                                                                                                                                                                                                                                                                                                                                                                                                                                                                                                                                                                                                                                                                                                                                                                                                             |
| Article Type:                 | Original research                                                                                                                                                                                                                                                                                                                                                                                                                                                                                                                                                                                                                                                                                                                                                                                                                                                                                                                                                                                                                               |
| Date Submitted by the Author: | 20-Apr-2022                                                                                                                                                                                                                                                                                                                                                                                                                                                                                                                                                                                                                                                                                                                                                                                                                                                                                                                                                                                                                                     |
| Complete List of Authors:     | Hunter, Lauren; University of California Berkeley, School of Public Health<br>Wyman, Stacia; University of California Berkeley, Innovative Genomics Institute<br>Packel, Laura; University of California Berkeley, School of Public Health<br>Facente, Shelley; University of California Berkeley, School of Public Health; Facente Consulting,<br>Li, Yi; University of California Berkeley, School of Public Health<br>Harte, Anna; University of California Berkeley, University Health Services<br>Nicolette, Guy; University of California Berkeley, University Health Services<br>the IGI SARS-CoV-2 Testing Consortium, N/A; University of California Berkeley, Innovative Genomics Institute<br>Di Germanio, Clara; Vitalant Research Institute<br>Busch, Michael; Vitalant Research Institute; University of California San Francisco, Department of Laboratory Medicine<br>Reingold, Art; University of California Berkeley, School of Public Health<br>Petersen, Maya L.; University of California Berkeley, School of Public Health |
| Keywords:                     | COVID-19, EPIDEMIOLOGY, Public health < INFECTIOUS DISEASES, Infection control < INFECTIOUS DISEASES, Epidemiology < INFECTIOUS DISEASES, PUBLIC HEALTH                                                                                                                                                                                                                                                                                                                                                                                                                                                                                                                                                                                                                                                                                                                                                                                                                                                                                         |
|                               |                                                                                                                                                                                                                                                                                                                                                                                                                                                                                                                                                                                                                                                                                                                                                                                                                                                                                                                                                                                                                                                 |

SCHOLARONE™  
Manuscripts

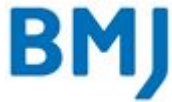

I, the Submitting Author has the right to grant and does grant on behalf of all authors of the Work (as defined in the below author licence), an exclusive licence and/or a non-exclusive licence for contributions from authors who are: i) UK Crown employees; ii) where BMJ has agreed a CC-BY licence shall apply, and/or iii) in accordance with the terms applicable for US Federal Government officers or employees acting as part of their official duties; on a worldwide, perpetual, irrevocable, royalty-free basis to BMJ Publishing Group Ltd ("BMJ") its licensees and where the relevant Journal is co-owned by BMJ to the co-owners of the Journal, to publish the Work in this journal and any other BMJ products and to exploit all rights, as set out in our [licence](#).

The Submitting Author accepts and understands that any supply made under these terms is made by BMJ to the Submitting Author unless you are acting as an employee on behalf of your employer or a postgraduate student of an affiliated institution which is paying any applicable article publishing charge ("APC") for Open Access articles. Where the Submitting Author wishes to make the Work available on an Open Access basis (and intends to pay the relevant APC), the terms of reuse of such Open Access shall be governed by a Creative Commons licence – details of these licences and which [Creative Commons](#) licence will apply to this Work are set out in our licence referred to above.

Other than as permitted in any relevant BMJ Author's Self Archiving Policies, I confirm this Work has not been accepted for publication elsewhere, is not being considered for publication elsewhere and does not duplicate material already published. I confirm all authors consent to publication of this Work and authorise the granting of this licence.

1 **Title:** Monitoring SARS-CoV-2 incidence and seroconversion in a university cohort in California,  
2 June to August 2020

3  
4 **Authors:** Lauren A. Hunter, MPH<sup>1</sup>; Stacia Wyman, PhD, MS<sup>2</sup>; Laura Packel, PhD<sup>1</sup>; Shelley  
5 Facente, PhD<sup>1,3-4</sup>; Yi Li, BS<sup>1</sup>; Anna Harte, MD<sup>5</sup>; Guy Nicolette, MD<sup>5</sup>; the IGI SARS-CoV-2  
6 Testing Consortium<sup>2</sup>; Clara Di Germanio, PhD<sup>4</sup>; Michael P. Busch, MD PhD<sup>4,6</sup>; Arthur Reingold,  
7 MD<sup>1</sup>; Maya Petersen, MD PhD<sup>1</sup>

8 <sup>1</sup> School of Public Health; University of California, Berkeley; Berkeley, CA

9 <sup>2</sup> Innovative Genomics Institute; University of California, Berkeley; Berkeley, CA

10 <sup>3</sup> Facente Consulting; Richmond, CA

11 <sup>4</sup> Vitalant Research Institute; San Francisco, CA

12 <sup>5</sup> University Health Services; University of California, Berkeley; Berkeley, CA

13 <sup>6</sup> Department of Laboratory Medicine; University of California, San Francisco; San Francisco,  
14 CA

15  
16 **Correspondence to:**

17 Ms. Lauren Hunter

18 Division of Epidemiology and Biostatistics

19 University of California, Berkeley School of Public Health

20 2121 Berkeley Way #5302

21 Berkeley, CA 94720

22 [lahunter@berkeley.edu](mailto:lahunter@berkeley.edu)

23  
24 **Word count:** 3,916

25 **Abstract word count:** 290

26 **Number of tables/figures:** 5 (2 supplementary)

1  
2  
3 **27 Abstract**  
4

5 **28 Objective:** To inform effective SARS-CoV-2 mitigation strategies in university settings, we  
6  
7 **29** piloted an integrated symptom and exposure monitoring and testing system among a cohort of  
8  
9 **30** university students and employees.

11 **31 Methods:** We aimed to identify incident SARS-CoV-2 infections in a longitudinal cohort of 2,180  
12  
13 **32** students and 738 employees of a public university in California from June to August 2020. At  
14  
15 **33** baseline and endline, we tested participants for active SARS-CoV-2 infection via quantitative  
16  
17 **34** polymerase chain reaction (qPCR) test and collected blood for antibody testing. Participants  
18  
19 **35** received notifications to complete additional qPCR tests throughout the study if they reported  
20  
21 **36** symptoms or exposures in daily surveys or were selected for surveillance testing. Viral whole  
22  
23 **37** genome sequencing was performed on positive qPCR samples, and phylogenetic trees were  
24  
25 **38** constructed with these genomes and external genomes retrieved from GISAID.

28 **39 Results:** Over the study period, 57 students (2.6%) and 3 employees (0.3%) were diagnosed  
29  
30 **40** with SARS-CoV-2 infection via qPCR test. Phylogenetic analyses revealed that a super-  
31  
32 **41** spreader event among undergraduates in congregate housing accounted for at least 48% of  
33  
34 **42** cases but did not spread beyond campus. Test positivity was higher among participants who  
35  
36 **43** self-reported symptoms (incidence rate ratio [IRR]: 12.4; 95% confidence interval [CI]: 7.3, 21.3)  
37  
38 **44** or had household exposures (IRR: 12.3; 95% CI: 5.6, 26.9) which triggered notifications to test.  
39  
40 **45** Most (91%) participants with newly identified antibodies at endline had been diagnosed with  
41  
42 **46** incident infection via qPCR test during the study.

45 **47 Conclusions:** Our findings suggest that integrated monitoring systems can successfully identify  
46  
47 **48** and link at-risk students to SARS-CoV-2 testing. Building upon such systems may prove key in  
48  
49 **49** the next stage of the pandemic, as universities grapple with highly transmissible variants,  
50  
51 **50** incomplete vaccine coverage and breakthrough infections, and reduced reliance on prevention  
52  
53 **51** strategies such as masking and remote learning.  
54  
55  
56  
57  
58  
59  
60

## 52 **Strengths and limitations of this study**

- 53       ● The study is strengthened by rich longitudinal data including more than 117,000 daily  
54       symptom surveys; 17,000 weekly exposure surveys; 7,600 qPCR tests to detect active  
55       SARS-CoV-2 infection; and 4,900 antibody tests to detect previous infection collected  
56       from 2,918 university students and employees over three months.
- 57       ● Using seroconversion data from serial antibody tests and phylogenetic analyses  
58       comparing viral genome sequences to a broader database, we were able to evaluate the  
59       extent to which the study system identified incident cases and contained an outbreak  
60       among university students. However, our identification of participants who seroconverted  
61       between baseline and endline may be incomplete due to loss-to-follow up and imperfect  
62       sensitivity of SARS-CoV-2 antibody testing.
- 63       ● A high proportion of identified cases were traced to one outbreak, limiting the  
64       generalizability of our exploratory assessment of risk factors for incident infection. While  
65       self-referral into the study in the context of the outbreak is likely to induce selection bias,  
66       it also illustrates the utility of implementing non-stigmatizing, incentivized testing  
67       approaches to increase testing uptake among at-risk students.
- 68       ● As the study took place before the development of highly transmissible variants and  
69       vaccine rollout, further research is necessary to adapt and evaluate similar systems in  
70       the context of both heightened transmissibility and more prevalent natural and vaccine-  
71       induced immunity.

## 72 **Background**

73           Universities have been identified as hotspots for SARS-CoV-2 transmission in the United  
74 States,<sup>1</sup> where SARS-CoV-2 incidence is highest among young adults.<sup>2</sup> Young adults may be  
75 less likely to adhere to social distancing guidelines and more likely to experience workplace  
76 exposure (for example, at food service or retail jobs).<sup>2</sup> Their risk may be heightened in university  
77 settings where many live in congregate housing, interact with wide social networks, or attend  
78 large gatherings.<sup>3</sup> Although young adults are at low risk of serious acute illness or death from  
79 COVID-19 (the disease caused by SARS-CoV-2),<sup>4</sup> the higher likelihood of asymptomatic or  
80 mildly symptomatic infection in this age group makes young adults a key population through  
81 which SARS-CoV-2 may be spread to other, more vulnerable groups.<sup>2,5</sup> Indeed, there is  
82 evidence that transmission among university students may lead to increased COVID-19-related  
83 mortality in the surrounding counties.<sup>6-8</sup> Although widespread vaccination has enabled most  
84 campuses to return to in-person activities, the elimination of SARS-CoV-2 transmission in  
85 campus populations may be stymied by vaccine hesitancy among students and employees and  
86 breakthrough infection and subsequent transmission by vaccinated persons, particularly in the  
87 context of waning immunity and viral variants which reduce vaccine efficacy.<sup>9,10</sup> Therefore, rapid  
88 and resource-efficient identification of incident cases in university populations is a critical first  
89 step of outbreak investigation and control, followed by isolation, case investigation, and contact  
90 tracing, to minimize transmission within campus and to the broader community.

91           Universities have adopted a wide range of approaches for testing and outbreak  
92 mitigation.<sup>11-13</sup> While a number of well-resourced universities have scaled up testing capacity in  
93 order to frequently test all students and employees accessing campus or living in university-  
94 affiliated housing,<sup>13</sup> many other universities do not have well-defined testing strategies or restrict  
95 testing to those with symptoms or known exposure.<sup>12</sup> Beyond investing in testing programs,  
96 some universities have sought to reduce on-campus transmission by mandating the completion  
97 of self-administered symptom screening tools by students and employees. However, such tools

1  
2  
3 98 have primarily been used to regulate daily access to campus (i.e., deny entry to those who  
4  
5 99 report COVID-19-like symptoms), rather than to detect emergent outbreaks among university  
6  
7 100 populations. As universities resume normal operations and discontinue mitigation strategies  
8  
9 101 such as masking, non-punitive, resource-efficient strategies which can both identify those who  
10  
11 102 are at highest risk of infection *and* expediently link them to low-barrier testing services may play  
12  
13 103 a key role in transitioning from a “one-size-fits-all” approach of uniform testing to a sustainable  
14  
15 104 monitoring paradigm.

16  
17  
18 105 In 2020, we piloted an integrated symptom and exposure monitoring and testing system  
19  
20 106 designed to identify incident SARS-CoV-2 infections among a cohort of university students and  
21  
22 107 employees.<sup>14</sup> Here we describe the incidence and seroprevalence of SARS-CoV-2 infection  
23  
24 108 within this cohort to evaluate the extent to which incident infections were successfully detected  
25  
26 109 and contained over the study period, identify sociodemographic factors associated with incident  
27  
28 110 infection, and ascertain which self-reported symptoms and exposures tracked by the monitoring  
29  
30 111 system were predictive of test positivity, with the ultimate objective of informing monitoring and  
31  
32 112 testing strategies in university settings.

33  
34  
35 113

## 36 37 114 **Methods**

### 38 39 115 *Study design and setting*

40  
41 116 The study comprised three prospective cohorts of University of California, Berkeley  
42  
43 117 affiliates followed from June to August 2020: students, essential workers (i.e., employees  
44  
45 118 working on campus in health, facilities, or key student services), and other employees  
46  
47 119 (hereafter, “faculty/staff”). We report the findings according to the Strengthening the Reporting  
48  
49 120 of Observational Studies in Epidemiology (STROBE) checklist for cohort studies.<sup>15</sup>

50  
51 121 Throughout the study period, UC Berkeley did not offer in-person classes, and on-  
52  
53 122 campus work was restricted to essential workers and a small subset of faculty, staff, and  
54  
55 123 student researchers. Although few students were living in on-campus residence halls, many



1  
2  
3 124 students continued to live in congregate living settings off campus, such as fraternities,  
4  
5 125 sororities, and co-operative housing.  
6

7 126  
8

9 127 *Participant recruitment and eligibility*

11 128 The study was promoted through targeted messages from university officials to campus  
12  
13 129 email listservs and social media platforms from early June to mid-July 2020. To increase reach  
14  
15 130 to students expected to be at higher risk of COVID-19, we also placed flyers in congregate living  
16  
17 131 settings and conducted in-person recruitment for student athletes who had resumed training on  
18  
19 132 campus. Participants were eligible to enroll in the study if they were at least 18 years of age,  
20  
21 133 were a current student or employee at UC Berkeley, and planned to live in or near Berkeley  
22  
23 134 during summer 2020. Specific eligibility criteria and enrollment windows varied by cohort  
24  
25 135 (Supplementary Table 1, Supplementary Figure 1).  
26  
27

28 136 Upon enrollment, participants were linked to an online baseline survey that collected  
29  
30 137 sociodemographic data and information about their COVID-19-related health history.  
31  
32 138 Participants were then referred to a baseline testing appointment at University Health Services  
33  
34 139 (UHS) which included a SARS-CoV-2 quantitative polymerase chain reaction (qPCR) test and  
35  
36 140 blood collection for antibody testing (procedures described below). To facilitate daily  
37  
38 141 temperature monitoring, study staff also provided participants with free oral thermometers upon  
39  
40 142 request at testing appointments. Participants who completed this appointment or a non-study  
41  
42 143 qPCR test at UHS by July 20th were eligible to remain in the study. We pre-specified a  
43  
44 144 maximum sample size of 4,000 participants across cohorts but did not reach this limit before the  
45  
46 145 final day of baseline data collection.  
47  
48

49 146

51 147 *Symptom and exposure surveys*

53 148 Participants received daily text messages or emails, depending on their preference  
54  
55 149 specified in the baseline survey, which linked to short symptom surveys through which they  
56  
57

1  
2  
3 150 reported their daily body temperature and any symptoms of illness. Once per week, the daily  
4  
5 151 survey included a longer exposure module, which asked about recent symptoms of illness  
6  
7 152 among their household member(s), potential exposure(s) to COVID-19, and activities related to  
8  
9 153 potential COVID-19 risk. All surveys were administered via REDCap.<sup>16,17</sup>  
10

11 154

### 13 155 *Endline survey and testing*

15 156 In early August, participants were sent an endline survey which collected updated  
16  
17 157 information on their COVID-19 history to identify any diagnoses outside of the study.

19 158 Participants in the student and essential worker cohorts were also invited to complete endline  
20  
21 159 testing appointments by August 18th, including a final qPCR test and blood collection.  
22  
23

24 160

### 26 161 *qPCR testing*

28 162 Midturbinate nasal and oral swabs were collected by UHS clinical staff and tested for  
29  
30 163 SARS-CoV-2 by qPCR at the Innovative Genomics Institute (IGI).<sup>18</sup> qPCR tests were performed  
31  
32 164 at baseline for all three cohorts and at endline for the student and essential worker cohorts.  
33

34 165 Between baseline and endline testing, additional qPCR tests were performed for the following  
35  
36 166 reasons:

- 38 167 • **Symptom- or exposure-based tests triggered based on participants' responses in**  
40  
41 168 **daily surveys:** Participants who reported COVID-19-like signs or symptoms<sup>1</sup> (in  
42  
43 169 themselves or household member(s)) or who reported a suspected or confirmed COVID-  
44  
45 170 19 case in their household were automatically notified to sign up for a qPCR test.

---

54  
55 <sup>1</sup> Signs or symptoms which triggered a testing notification when reported were: temperature of  $\geq 100.4^{\circ}\text{F}$ , dry cough  
56 (without mucus), coughing up mucus, feeling feverish, unusual pain or pressure in the chest, difficulty breathing,  
57 shortness of breath, unexplained trouble thinking or concentrating, loss of sense of taste, or loss of sense of smell.

- 1  
2  
3 171 • **Random surveillance testing:** A subset of participants in the student and faculty/staff  
4  
5 172 cohorts who had not had a qPCR test within a week were randomly selected and  
6  
7 173 emailed notifications to come in for surveillance testing in July.  
8  
9 174 • **Address-based surveillance testing:** Participants who lived at the same address as  
10  
11 175 another participant who tested positive for SARS-CoV-2 were immediately emailed  
12  
13 176 surveillance testing notifications. Following an outbreak among group-housed students  
14  
15 177 in early July, surveillance testing notifications were also emailed to all participants who  
16  
17 178 had not been tested within the week and who reported living in fraternities, sororities, or  
18  
19 179 co-operative housing.  
20  
21  
22 180 • **Participant-initiated testing:** Participants could self-schedule study testing  
23  
24 181 appointments on demand, with or without consulting a healthcare provider and  
25  
26 182 regardless of exposure history.

27  
28 183 Participants with positive qPCR test results were informed by phone by UHS clinical staff, who  
29  
30 184 provided guidance on isolation and performed case investigation to identify potential contacts.  
31  
32 185 Participants with negative qPCR test results were informed of their results via the UHS online  
33  
34 186 patient portal.  
35  
36

37 187

### 38 39 188 *SARS-CoV-2 sequencing and phylogenetic analyses*

40  
41 189 Viral whole genome sequencing was performed on a set of positive samples at the IGI,  
42  
43 190 using previously described procedures.<sup>19</sup> Briefly, SARS-CoV-2 RNA extracted from swabs was  
44  
45 191 reverse transcribed using SuperScript IV (Invitrogen), and the viral genome was amplified from  
46  
47 192 the resulting cDNA in four separate qPCR reactions using distinct primer sets tiling the SARS-  
48  
49 193 CoV-2 genome. The four qPCR reactions were pooled 1:1:1:1 and diluted 1:50 in H<sub>2</sub>O. A  
50  
51 194 second qPCR reaction was set up to add Nextera Unique Dual Indexing (UDI) sequences to  
52  
53 195 either end of the amplicons. The resulting qPCR reaction was cleaned up using 0.7x AMPureXP  
54  
55 196 beads (Beckman Coulter) and quantified using a Qubit dsDNA HS Assay Kit (Thermo Fisher).

1  
2  
3 197 The libraries were then pooled to an equimolar ratio and sequenced with a 10% PhiX spike in  
4  
5 198 using a MiSeq v3 kit at 300bp PE reads.  
6

7 199 Fastq sequencing files were processed through a custom pipeline using publicly  
8  
9 200 available software. The reads were preprocessed by quality trimming, removing adaptors, and  
10  
11 201 PhiX cleaning with BBTtools,<sup>20</sup> and then aligned to the Wuhan reference sequence  
12  
13 202 (NC\_045512.2) with minimap2 v2.16-r922. ARTICv3 primers were trimmed, and the consensus  
14  
15 203 sequence was built with iVar v1.3.1, where an 'N' is called if the depth is less than 10 reads at  
16  
17 204 any nucleotide. The genomes were then processed through the Nextstrain Auger pipeline with  
18  
19 205 other genomes from GISAID to construct a maximum likelihood tree.<sup>21,22</sup> Several phylogenies  
20  
21 206 were constructed for this analysis: a tree of 7,091 genomes subsampled from the worldwide  
22  
23 207 genomes in GISAID at the time (approximately 200,000 genomes as of October 2020) was used  
24  
25 208 to place the IGI genomes in the larger tree; a tree with all IGI genomes sequenced at the time of  
26  
27 209 analysis (356 genomes); and a tree containing 500 genomes (from 1 million genomes as of April  
28  
29 210 2021) was constructed using USHER.<sup>23</sup>  
30  
31  
32

33 211

### 34 212 *Antibody testing*

35  
36  
37 213 Up to 10 mL of blood was collected by phlebotomists via venipuncture at baseline from  
38  
39 214 participants in all three cohorts and again at endline from participants in the student and  
40  
41 215 essential worker cohorts. Blood was centrifuged and serum was stored at -20°C for 2 to 4  
42  
43 216 months before being tested at Vitalant Research Institute using the VITROS Immunodiagnostic  
44  
45 217 Products Anti-SARS-CoV-2 Total Reagent Pack, which detects IgA, IgG, and IgM antibodies  
46  
47 218 and has an estimated clinical specificity of 100% and unreported sensitivity.<sup>24</sup>  
48  
49

50 219

### 51 220 *Participant compensation*

52  
53  
54 221 Participants in the student cohort received a \$50 gift card after completing baseline  
55  
56 222 testing and 10 daily surveys; this incentive was conditional on daily survey completion to  
57

223 encourage early habit formation.<sup>25</sup> Student participants received a second \$50 gift card at their  
224 endline testing appointment. To facilitate travel to and from UHS for testing appointments,  
225 student participants were also offered pre-paid car rides via a ride-sharing app.

226 Participants in the essential worker cohort received a gift card worth \$1 per daily survey  
227 completed (to a maximum of \$70) after the study ended. Participants in the faculty/staff cohort  
228 were not compensated.

229

### 230 *Statistical analyses*

231 To identify sociodemographic factors associated with incident infection, we used Poisson  
232 regression to estimate unadjusted incidence rate ratios (IRRs) for SARS-CoV-2 infection by  
233 study cohort and within strata of sociodemographic variables self-reported in the baseline  
234 survey (e.g., age, gender, housing type), setting person-months of enrollment as an offset term  
235 to account for differing lengths of follow-up.

236 We also calculated IRRs comparing test positivity by recent signs/symptoms, exposures,  
237 and activities reported in the daily and weekly surveys. We estimated IRRs for several  
238 temperature thresholds (i.e.,  $\geq 100.4^{\circ}\text{F}$ ,  $\geq 100.0^{\circ}\text{F}$ ,  $\geq 99.0^{\circ}\text{F}$ ) to compare to symptom-specific  
239 IRRs; however, continuous associations between temperature and positivity have been  
240 previously explored in this cohort.<sup>26</sup> We accounted for clustered observations due to repeated  
241 tests per participant using a generalized estimating equation approach with Huber-White  
242 standard error estimates and an exchangeable working correlation structure.<sup>27</sup>

243 Finally, to assess the extent to which the testing and monitoring system captured  
244 incident infections, we identified participants who seroconverted from having non-reactive (no  
245 antibodies detected) to reactive (antibodies detected) blood samples between baseline and  
246 endline and calculated the proportion of these participants who were also diagnosed with  
247 incident SARS-CoV-2 infection via positive qPCR test during the study period. Analyses were  
248 conducted in R version 4.0.4.<sup>28</sup>

1  
2  
3 2494  
5 250 *Ethical approvals*

6  
7 251 All study activities were approved by the University of California, Berkeley Committee for  
8  
9 252 the Protection of Human Subjects (#2020-06-13349, #2020-05-13261, #2020-04-13238).

10  
11 25312  
13  
14 254 *Patient and public involvement*

15 255 The study's target population comprised university students and employees. While the  
16  
17 256 study was conducted by faculty, staff, and graduate students from the UC Berkeley School of  
18  
19 257 Public Health, University Health Services, and the Innovative Genomics Institute, the broader  
20  
21 258 student body and university workforce were not involved in designing the study or selecting the  
22  
23 259 research question, outcome measures, or method of disseminating results.

24  
25  
26 26027  
28 261 **Results**29  
30 262 *Participant recruitment and retention*

31  
32 263 Between June 1 and July 20th, 2020, we enrolled 2,180 students, 268 essential workers,  
33  
34 264 and 470 faculty/staff who completed at least one qPCR test or antibody test (Table 1,  
35  
36 265 Supplementary Figure 1). The student cohort was split between undergraduate (52%) and  
37  
38 266 graduate (48%) students. Nearly half (44%) of essential workers worked in health services.  
39  
40 267 While 85% of essential workers were working on campus at the time of enrollment, most (81%)  
41  
42 268 faculty/staff were working entirely remotely. At the time of enrollment, only 12 (0.4%)  
43  
44 269 participants reported a previous COVID-19 diagnosis.

45  
46 270 Participants provided a total of 5,545 person-months of follow-up from enrollment to the  
47  
48 271 end of the study (mean person-days per participant: 57, range: 32-78). Participants completed a  
49  
50 272 mean of 40 daily symptom surveys and 6 weekly exposure surveys over the study period, for a  
51  
52 273 total of 117,235 symptom and 17,172 exposure surveys. A subset of participants did not  
53  
54 274 complete any daily symptom surveys (1.7%) or weekly exposure surveys (4.2%).

**Table 1.** Baseline characteristics of participants in the Berkeley COVID-19 Safe Campus Initiative by study cohort, June-August 2020.

|                                                  | All             | Students       | Essential Workers | Faculty/Staff   |
|--------------------------------------------------|-----------------|----------------|-------------------|-----------------|
| N (row %)                                        | 2,918 (100)     | 2,180 (74.7)   | 268 (9.2)         | 470 (16.1)      |
| Age, mean $\pm$ SD                               | 29.4 $\pm$ 11.6 | 24.3 $\pm$ 5.4 | 42.5 $\pm$ 12.3   | 45.2 $\pm$ 12.3 |
| Gender, n (column %)                             |                 |                |                   |                 |
| Man                                              | 1,177 (40.3)    | 911 (41.8)     | 103 (38.4)        | 163 (34.7)      |
| Woman                                            | 1,653 (56.6)    | 1,187 (54.4)   | 164 (61.2)        | 302 (64.3)      |
| Non-binary/other                                 | 51 (1.7)        | 46 (2.1)       | 1 (0.4)           | 4 (0.9)         |
| Race/ethnicity, n (column %)*                    |                 |                |                   |                 |
| American Indian/Alaska Native                    | 39 (1.3)        | 29 (1.3)       | 2 (0.7)           | 8 (1.7)         |
| Asian/Pacific Islander                           | 833 (28.5)      | 703 (32.2)     | 66 (24.6)         | 64 (13.6)       |
| Black/African American                           | 103 (3.5)       | 83 (3.8)       | 16 (6.0)          | 4 (0.9)         |
| Hispanic/Latine/Spanish origin                   | 420 (14.4)      | 346 (15.9)     | 39 (14.6)         | 35 (7.4)        |
| White                                            | 1,814 (62.2)    | 1,261 (57.8)   | 160 (59.7)        | 393 (83.6)      |
| Other                                            | 280 (9.6)       | 223 (10.2)     | 31 (11.6)         | 26 (5.5)        |
| Program level, n (column %)                      |                 |                |                   |                 |
| Undergraduate                                    | -               | 1,114 (51.7)   | -                 | -               |
| Graduate                                         | -               | 1,039 (48.2)   | -                 | -               |
| Living at fraternity/sorority, n (column %)      | -               | 125 (5.7%)     | -                 | -               |
| Education, n (column %)                          |                 |                |                   |                 |
| High school diploma/GED                          | -               | -              | 6 (2.2)           | 0 (0)           |
| Some college or trade school                     | -               | -              | 59 (22.0)         | 13 (2.8)        |
| Bachelor's degree                                | -               | -              | 78 (29.1)         | 119 (25.3)      |
| Graduate/professional degree                     | -               | -              | 121 (45.1)        | 337 (71.7)      |
| Department, n (column %)                         |                 |                |                   |                 |
| Health services                                  | -               | -              | 129 (48.1)        | -               |
| Facilities/building services                     | -               | -              | 61 (22.8)         | -               |
| Student services/other                           | -               | -              | 77 (28.7)         | -               |
| Job title, n (column %)                          |                 |                |                   |                 |
| Faculty                                          | -               | -              | -                 | 110 (23.4)      |
| Staff                                            | -               | -              | -                 | 311 (66.2)      |
| Postdoctoral scholar/other                       | -               | -              | -                 | 49 (10.4)       |
| Currently working outside the home, n (column %) | 748 (25.6)      | 418 (19.2)     | 228 (85.1)        | 102 (21.7)      |
| Pre-enrollment COVID-19 diagnosis, n (column %)  | 12 (0.4)        | 8 (0.4)        | 1 (0.4)           | 3 (0.6)         |

\*Categories not mutually exclusive.

1  
2  
3 279 *SARS-CoV-2 incidence*  
4

5 280 During the study period, participants underwent 7,638 qPCR tests for active SARS-CoV-  
6  
7 281 2 infection, with a mean of 2.6 tests per participant (range: 0-9). Almost all (99.9%) participants  
8  
9 282 completed at least one qPCR test. Overall, 60 participants (2.0%) tested positive: 57 students, 2  
10  
11 283 essential workers, and 1 faculty/staff.  
12

13  
14 284 Among cohorts, students were at highest risk of incident infection over the study period  
15  
16 285 (IRR students vs. faculty/staff: 5.83; 95% confidence interval [CI]: 1.28, 102.99). Due to the low  
17  
18 286 number of cases outside of the student cohort, we examined additional risk factors for infections  
19  
20 287 among students only (Table 2), finding higher rates of infection among students who were 18-19  
21  
22 288 years old (IRR vs. students  $\geq 22$  years: 8.34; 95% CI: 4.17, 17.48) and undergraduates (IRR vs.  
23  
24 289 graduate students: 4.12; 95% CI: 2.17, 8.66). We also observed a higher incidence among  
25  
26 290 white students (IRR: 2.80 vs. non-white students; 95% CI: 1.53, 5.54). These associations were  
27  
28 291 largely driven by an outbreak among participants living in fraternities or sororities. Nearly one-  
29  
30 292 quarter of participants living in fraternities or sororities were infected with SARS-CoV-2 during  
31  
32 293 the study period (IRR vs. other students: 20.86; 95% CI: 12.27, 35.54), and these participants  
33  
34 294 accounted for 49% of cases observed among student participants.  
35  
36  
37  
38  
39  
40  
41  
42  
43  
44  
45  
46  
47  
48  
49  
50  
51  
52  
53  
54  
55  
56  
57  
58  
59  
60



**Table 2.** Bivariate associations between sociodemographic characteristics and SARS-CoV-2 incidence among student participants in the Safe Campus Initiative, June-August 2020.

|                                    | Cases,<br>N (row %) | Non-Cases,<br>N (row %) | IRR (95% CI)         |
|------------------------------------|---------------------|-------------------------|----------------------|
| Overall*                           | 57 (2.6)            | 2,120 (97.4)            | -                    |
| Age                                |                     |                         |                      |
| 18-19 years                        | 21 (8.0)            | 243 (92.0)              | 8.34 (4.17, 17.48)   |
| 20-21 years                        | 24 (3.8)            | 607 (96.2)              | 4.15 (2.11, 8.58)    |
| ≥22 years                          | 12 (0.9)            | 1,270 (99.1)            | Reference            |
| Gender                             |                     |                         |                      |
| Woman                              | 37 (3.1)            | 1,147 (96.9)            | 1.45 (0.85, 2.58)    |
| Man                                | 19 (2.1)            | 892 (97.9)              | Reference            |
| Non-binary/other                   | 0 (0)               | 46 (100)                | -                    |
| Race/ethnicity**                   |                     |                         |                      |
| American Indian/Alaska Native      | 0 (0)               | 29 (100)                | -                    |
| Asian/Pacific Islander             | 11 (1.6)            | 691 (98.4)              | 0.49 (0.24, 0.91)    |
| Black/African American             | 1 (1.2)             | 82 (98.8)               | 0.45 (0.03, 2.03)    |
| Hispanic/Latine/Spanish origin     | 8 (2.3)             | 337 (97.7)              | 0.88 (0.39, 1.76)    |
| White                              | 45 (3.6)            | 1,216 (96.4)            | 2.80 (1.53, 5.54)    |
| Other                              | 4 (1.8)             | 217 (98.2)              | 0.65 (0.20, 1.58)    |
| Program level                      |                     |                         |                      |
| Undergraduate                      | 46 (4.1)            | 1,067 (95.9)            | 4.12 (2.17, 8.66)    |
| Graduate                           | 10 (1.0)            | 1,027 (99.0)            | Reference            |
| Living at fraternity/sorority      | 28 (22.4)           | 97 (77.6)               | 20.86 (12.27, 35.54) |
| Currently working outside the home | 6 (1.4)             | 410 (98.6)              | 0.51 (0.20, 1.11)    |

IRR: incidence rate ratio, CI: confidence interval.

\*N=2,177 students with at least one qPCR test for SARS-CoV-2 during the study period.

\*\*Not mutually exclusive; all participants not included in specified racial/ethnic category served as reference for each comparison.

### Phylogenetic analysis

We retrieved whole viral genome sequences for 35 of the 60 positive cases from this study, 29 (83%) of which were found to be part of a campus super-spreader event involving a total of 57 campus-affiliated individuals with samples sequenced by IGI (Figure 1A). Most (69%) study participants within this cluster lived at one of two residences, with likely a single participant originating the super-spreader event. The cluster of genomes was defined by three mutations (A6360G, C24502A and G110083T), two of which were extremely rare at the time of the outbreak. The combination of the three variants was only found in four genomes outside of

1  
2  
3 310 this cluster (two in the UK and two in Florida) by October 2020, making it a strong phylogenetic  
4  
5 311 signature.

6  
7 312 Phylogenetic analysis demonstrated that the cluster remained confined to campus, as  
8  
9 313 this signature was not observed in any genomes from samples in the surrounding communities  
10  
11 314 or California state in the months following the super-spreader event. When the trio of mutations  
12  
13 315 was searched in a phylogeny constructed from over 1.2 million genomes worldwide using  
14  
15 316 USHER in April 2021,<sup>23</sup> no descendent leaves were found in the tree under the cluster (Figure  
16  
17 317 1B), indicating that the lineage died out after the super-spreader event.

18  
19  
20 318  
21 319 *Factors associated with test positivity*

22  
23 320 At least one symptom survey was completed in the 7 days before sample collection for  
24  
25 321 90% of tests (n=6,864), including 72% of tests (n=5,469) that had symptom data from the day of  
26  
27 322 sample collection. Of the 54 cases who completed at least one survey during the week before  
28  
29 323 their positive sample was collected (mean: 4 surveys), 23 cases (43%) had reported at least  
30  
31 324 one of the nine COVID-19 symptoms that triggered a notification for them to test. Test positivity  
32  
33 325 was 12.4 times higher among participants who had a recent symptom-triggered notification  
34  
35 326 (95% CI: 7.3, 21.3) (Table 3). Notification-triggering symptoms most strongly associated with  
36  
37 327 test positivity included loss of sense of taste or smell and feeling feverish. Weakness, sweats or  
38  
39 328 chills, and swollen glands were the non-triggering symptoms most strongly associated with test  
40  
41 329 positivity.

**Table 3.** Bivariate associations between prospectively monitored symptoms and exposures and SARS-CoV-2 qPCR test positivity among participants in the Safe Campus Initiative, June-August 2020.

|                                                                    | Test Positivity,<br>% (+ Tests / All Tests) | IRR (95% CI)      |
|--------------------------------------------------------------------|---------------------------------------------|-------------------|
| Overall*                                                           | 0.8 (60 / 7,629)                            | -                 |
| Signs/symptoms within 7 days of test                               |                                             |                   |
| No                                                                 | 0.4 (21 / 5,704)                            | Reference         |
| Yes (any)                                                          | 3.2 (31 / 971)                              | 8.6 (5.0, 14.9)   |
| - Temperature $\geq 100.4^{\circ}\text{F}$ †                       | 0.0 (0 / 8)                                 | 0.0 (0.0, 0.0)    |
| - Temperature $\geq 100.0^{\circ}\text{F}$                         | 11.8 (2 / 17)                               | 15.6 (4.1, 60.4)  |
| - Temperature $\geq 99.0^{\circ}\text{F}$                          | 2.6 (9 / 346)                               | 4.1 (1.9, 8.7)    |
| - Feeling feverish †                                               | 14.9 (11 / 74)                              | 23.7 (12.7, 44.3) |
| - Dry cough †                                                      | 5.5 (7 / 128)                               | 7.9 (3.6, 17.2)   |
| - Coughing up mucus †                                              | 5.5 (5 / 91)                                | 7.6 (3.1, 18.8)   |
| - Unusual chest pain or pressure †                                 | 9.7 (6 / 62)                                | 13.8 (6.1, 31.1)  |
| - Difficulty breathing †                                           | 5.6 (1 / 18)                                | 7.2 (1.1, 48.7)   |
| - Shortness of breath †                                            | 8.7 (4 / 46)                                | 11.9 (4.4, 31.9)  |
| - Trouble thinking/concentrating †                                 | 7.6 (5 / 66)                                | 10.6 (4.3, 25.7)  |
| - Loss of sense of taste †                                         | 42.9 (3 / 7)                                | 57.6 (23.5, 141)  |
| - Loss of sense of smell †                                         | 33.3 (4 / 12)                               | 45.8 (19.0, 110)  |
| - Any notification-triggering symptom †                            | 5.8 (23 / 397)                              | 12.4 (7.3, 21.3)  |
| - Loss of appetite                                                 | 10.0 (6 / 60)                               | 14.3 (6.3, 32.5)  |
| - Fatigue                                                          | 3.5 (13 / 373)                              | 5.6 (3.0, 10.4)   |
| - Trouble sleeping                                                 | 5.1 (7 / 137)                               | 7.4 (3.4, 16.1)   |
| - Headache                                                         | 4.6 (14 / 302)                              | 7.7 (4.2, 14.1)   |
| - Runny, blocked, or painful sinuses                               | 5.2 (14 / 268)                              | 8.8 (4.8, 16.0)   |
| - Sneezing                                                         | 1.9 (2 / 104)                               | 2.5 (0.6, 10.0)   |
| - Swollen, red, or painful eyes                                    | 8.6 (5 / 53)                                | 12.1 (4.9, 29.7)  |
| - Sore throat                                                      | 3.1 (8 / 259)                               | 4.5 (2.1, 9.4)    |
| - Stomach pain                                                     | 5.8 (5 / 86)                                | 8.1 (3.3, 19.8)   |
| - Diarrhea                                                         | 4.8 (4 / 83)                                | 6.6 (2.4, 17.8)   |
| - Nausea or vomiting                                               | 3.3 (3 / 92)                                | 4.4 (1.4, 13.6)   |
| - Body aches or muscle pain                                        | 8.1 (12 / 149)                              | 13.0 (7.0, 24.4)  |
| - Sweats or chills                                                 | 11.3 (10 / 89)                              | 17.5 (9.0, 34.0)  |
| - Swollen glands                                                   | 11.9 (5 / 42)                               | 16.6 (7.0, 39.7)  |
| - Weakness                                                         | 13.2 (10 / 76)                              | 20.5 (10.6, 39.4) |
| Exposures within 14 days before test                               |                                             |                   |
| No                                                                 | 0.3 (14 / 4,179)                            | Reference         |
| Yes (any)                                                          | 3.4 (17 / 499)                              | 10.1 (5.0, 20.4)  |
| - Suspected or confirmed COVID-19 case in household †              | 6.7 (6 / 89)                                | 14.7 (6.0, 35.9)  |
| - Close contact with suspected or confirmed case outside household | 2.9 (4 / 138)                               | 6.3 (2.2, 18.2)   |
| - Household member with new COVID-19-like symptoms †               | 4.4 (5 / 114)                               | 7.6 (3.0, 19.6)   |
| - Household member with any new symptoms of illness                | 2.4 (8 / 336)                               | 4.7 (2.1, 10.4)   |

|                                          |                  |                  |
|------------------------------------------|------------------|------------------|
| - Any notification-triggering exposure † | 5.2 (9 / 173)    | 12.3 (5.6, 26.9) |
| Activities within 14 days before test    |                  |                  |
| No                                       | 0.5 (3 / 630)    | Reference        |
| Yes (any)                                | 0.7 (29 / 4,142) | 1.5 (0.5, 4.8)   |
| - Spent time at another residence        | 1.1 (26 / 2,330) | 4.6 (1.9, 11.1)  |
| - Had visitors at own residence          | 1.0 (22 / 2,203) | 2.5 (1.2, 5.4)   |
| - Attended gathering >10 people          | 2.8 (19 / 672)   | 9.0 (4.4, 18.1)  |
| - Worked outside of home                 | 0.5 (10 / 2,132) | 0.6 (0.3, 1.2)   |
| - Used public restroom                   | 0.7 (12 / 1,830) | 1.0 (0.5, 2.0)   |
| - Used public transportation             | 0.6 (5 / 695)    | 0.8 (0.3, 2.3)   |
| - Participated in group sports           | 1.6 (4 / 255)    | 2.6 (0.9, 7.3)   |

qPCR: quantitative polymerase chain reaction, IRR: incidence rate ratio, CI: confidence interval.

\*Excluding resamples and repeated positives; includes N=2,914 participants with at least one qPCR test for SARS-CoV-2 during the study period.

† Reporting triggered notification to test.

Participants completed at least one weekly exposure survey in the 14 days before sample collection for 61% of tests (n=4,678). Of the 31 cases who had recently completed an exposure survey at the time of sample collection, 9 (29%) reported a potential household exposure that triggered a notification for them to test (Table 3). Test positivity was 12.3 times higher among participants who had a recent exposure-triggered notification (95% CI: 5.6, 26.9). Test positivity was also significantly higher among participants who reported recent engagement in 'higher risk' social activities, most notably attending a gathering of more than 10 people (IRR: 9.0; 95% CI: 4.4, 18.1).

### SARS-CoV-2 seroprevalence

Only 18 (0.6%) of 2,877 participants who provided blood samples at baseline had SARS-CoV-2 antibodies (Table 4), all but one of them students. Most participants with antibodies at baseline either suspected past infection (28%), had been previously diagnosed (22%), or had a positive qPCR test the day blood was drawn (11%). Most (85%) participants in the student and essential worker cohorts provided blood samples at both baseline and endline (mean interval between samples: 48 days). Among 2,076 participants with baseline and endline blood samples, 33 (1.6%) seroconverted from non-reactive at baseline to reactive at endline, 30

355 of whom (91%) were also diagnosed via qPCR test during the study. Of the three participants  
 356 who seroconverted without a positive qPCR test, two self-reported suspected past infection (one  
 357 before baseline, one during the study period), while the third did not suspect past infection and  
 358 had four negative qPCR tests over 40 days of study participation.

359 Of the 60 participants with incident SARS-CoV-2 infection during the study period, 41  
 360 (68%) provided an endline blood sample at least one week after the date of their first positive  
 361 qPCR test (mean time between positive qPCR test and blood sample: 36 days; range 13-52  
 362 days). Of these, 34 (83%) were reactive (Table 4).

363

364 **Table 4.** Seroprevalence of SARS-CoV-2 antibodies among participants in the Safe Campus  
 365 Initiative, June-August 2020.

|                                             | Baseline, N (%) | Endline, N (%) | Both, N (%)  |
|---------------------------------------------|-----------------|----------------|--------------|
| <b>Serostatus – Cross-sectional*</b>        |                 |                |              |
| Reactive                                    | 18 (0.6)        | 48 (2.3)       | -            |
| Non-reactive                                | 2,859 (99.4)    | 2,039 (97.7)   | -            |
| <b>Serostatus – Longitudinal**</b>          |                 |                |              |
| Non-Reactive → Non-Reactive                 | -               | -              | 2,029 (97.7) |
| Non-Reactive → Reactive                     | -               | -              | 33 (1.6)     |
| Reactive → Non-Reactive                     | -               | -              | 0 (0)        |
| Reactive → Reactive                         | -               | -              | 14 (0.7)     |
| <b>Serostatus – Previous qPCR Positive†</b> |                 |                |              |
| Reactive                                    | -               | 34 (82.9)      | -            |
| Non-reactive                                | -               | 7 (17.1)       | -            |

366 qPCR: quantitative polymerase chain reaction.

367 \*N=2,888 participants who provided at least one blood sample.

368 \*\*N=2,076 participants who provided blood samples at baseline and endline.

369 †N=41 participants who provided an endline blood sample ≥7 days *after* infection with SARS-CoV-2 identified via  
 370 positive qPCR test.

371

## 372 Discussion

373 This study provides a model of a voluntary, incentivized system to identify and link at-risk  
 374 students to SARS-CoV-2 testing. While the incidence and seroprevalence of SARS-CoV-2 were  
 375 generally low in this cohort of university students and employees in the summer of 2020, we

1  
2  
3 376 observed the highest incidence among undergraduate students living in congregate settings,  
4  
5 377 with nearly half of cases found to be associated with a super-spreader event.  
6

7 378         Within this cohort, we previously demonstrated the acceptability of our low-barrier  
8  
9 379 SARS-CoV-2 mitigation approach and the limitations of temperature monitoring as a tool for  
10  
11 380 case identification.<sup>14,26</sup> The present analysis builds upon these contributions by triangulating  
12  
13 381 prospective qPCR testing data with phylogenetic analyses of positive samples and serial  
14  
15 382 antibody testing to evaluate whether case identification and containment were achieved. In  
16  
17 383 doing so, we found evidence that the system successfully identified a high proportion of incident  
18  
19 384 SARS-CoV-2 cases among participants and may have mitigated community transmission after  
20  
21 385 an outbreak. Specifically, 91% of participants with newly-identified antibodies for SARS-CoV-2  
22  
23 386 at the end of the study had also been diagnosed with incident infection via qPCR test during the  
24  
25 387 study period. While a sizeable cluster of cases among participants was traced to a single super-  
26  
27 388 spreader event, the associated cluster lineage was successfully contained without spreading  
28  
29 389 beyond campus. As the outbreak unfolded, the system also allowed for rapid real-time response  
30  
31 390 (i.e., surveillance testing notifications to students living in congregate housing) and offered a  
32  
33 391 readily accessible, incentivized entry point for testing for students concerned about potential  
34  
35 392 exposure.  
36  
37

38  
39 393         Although some universities have adopted punitive measures intended to prevent  
40  
41 394 transmission by controlling student behavior (for example, suspending students for hosting  
42  
43 395 gatherings),<sup>29–31</sup> this approach has been criticized for its potential to reduce students' trust and  
44  
45 396 cooperation.<sup>32–34</sup> Instead of punishing or shaming students who fail to adhere to public health  
46  
47 397 guidance, some epidemiologists have called for a harm-reduction approach which supports and  
48  
49 398 engages students as part of the solution.<sup>32–34</sup> The present study reinforces the potential to  
50  
51 399 integrate voluntary testing and risk monitoring systems to support targeted case identification,  
52  
53 400 as evidenced by the significantly higher positivity rates found among participants whose self-  
54  
55 401 reported symptoms and exposures triggered notifications to test. Our findings also support  
56  
57  
58  
59  
60

1  
2  
3 402 increased outreach to groups of students at highest risk, particularly younger students in  
4  
5 403 congregate housing.  
6

7 404 This study is strengthened by rich longitudinal data, including symptom and exposure  
8  
9 405 tracking, qPCR testing, and seroprevalence data from more than 2,000 participants. The study  
10  
11 406 population comprised of a broad sample of university affiliates, both students and employees,  
12  
13 407 with strong representation of university subpopulations perceived to be at higher risk of infection  
14  
15 408 (e.g., undergraduates, essential healthcare workers). As on-campus activities were severely  
16  
17 409 restricted throughout the study period (all classes were held online, and few students were living  
18  
19 410 in residence halls), this study cannot provide insight into SARS-CoV-2 transmission risks related  
20  
21 411 to on-campus student activities. Nevertheless, as 73% of UC Berkeley undergraduate students  
22  
23 412 lived off campus *before* the pandemic,<sup>35</sup> systems to detect off-campus (i.e., community and  
24  
25 413 household) transmission remain important for SARS-CoV-2 monitoring efforts among students.  
26  
27 414 Additionally, all participants in the essential workers cohort and a subset of participants in the  
28  
29 415 faculty/cohort were working on campus during the study period, further motivating efforts to  
30  
31 416 monitor incidence in this population.  
32  
33

34 417 There remain several limitations. We observed relatively few SARS-CoV-2 cases during  
35  
36 418 the study period, which took place before the development of highly transmissible variants, such  
37  
38 419 as Delta and Omicron, and before vaccine rollout. Further research is necessary to adapt and  
39  
40 420 evaluate similar systems in the context of both heightened transmissibility and more prevalent  
41  
42 421 natural and vaccine-induced immunity. Observed associations between symptoms and positivity  
43  
44 422 may also differ among those who have been infected by more recent variants and/or  
45  
46 423 vaccinated. Additionally, a high proportion of identified cases were traced to one outbreak,  
47  
48 424 limiting the generalizability of our exploratory assessment of risk factors for incident infection.  
49  
50 425 There was also anecdotal evidence that the outbreak prompted exposed students to enroll as  
51  
52 426 study participants.<sup>14</sup> While this self-referral into the study is likely to increase selection bias, it  
53  
54 427 also illustrates the utility of implementing non-stigmatizing, incentivized testing approaches to  
55  
56  
57  
58  
59  
60

1  
2  
3 428 increase testing uptake among at-risk students. Finally, our identification of participants who  
4  
5 429 seroconverted between baseline and endline may be incomplete due to loss-to-follow up and  
6  
7 430 imperfect sensitivity of SARS-CoV-2 antibody testing.  
8

9 431 By integrating symptom and exposure monitoring systems with low-barrier testing, we  
10  
11 432 identified incident SARS-CoV-2 infections to reduce transmission within a university setting.  
12

13 433 While there have been seismic shifts in the SARS-CoV-2 pandemic since 2020, universities  
14  
15 434 continue to grapple with how best to mitigate on-campus spread in the face of emerging  
16  
17 435 variants, incomplete vaccination coverage, breakthrough infections, and decreased reliance on  
18  
19 436 other mitigation strategies (e.g., masking, remote learning).<sup>36,37</sup> The lessons learned through this  
20  
21 437 study may inform the design of future adaptive strategies, ideally building beyond  
22  
23 438 symptom/exposure monitoring and qPCR testing to integrate complementary interventions such  
24  
25 439 as rapid antigen self-testing and vaccination promotion.  
26  
27  
28  
29  
30  
31  
32  
33  
34  
35  
36  
37  
38  
39  
40  
41  
42  
43  
44  
45  
46  
47  
48  
49  
50  
51  
52  
53  
54  
55  
56  
57  
58  
59  
60



1  
2  
3 440 **Keywords:** COVID-19, SARS-CoV-2, United States, young adults, students, universities,  
4  
5 441 essential workers, seroprevalence  
6

7 442  
8 443 **Acknowledgements**  
9

10 444 We are grateful for the contributions of an exceptional team of graduate student  
11  
12 445 researchers (Mariah De Zuzuarregui, Darren Frank, Sarah Gomez-Aladino, Ariel Muñoz, Ruben  
13  
14 446 Prado, Lawrence Tello, Emily Wang, and Sabrina Williamson) and our collaborators at UC  
15  
16 447 Berkeley's University Health Services (including but not limited to: Judith Sansone, Melody  
17  
18 448 Heller, Holly Stern, Tyler Crooks, Desi Gallardo, Jeff Kreutzen, Rebecca Stephenson, Lisa  
19  
20 449 Polley, and Melissa Hennings), the Innovative Genomics Institute (including but not limited to:  
21  
22 450 Fyodor Urnov, Shana McDevitt, Ariana Hirsch, Alexander Ehrenberg, and the other members of  
23  
24 451 the IGI SARS-CoV-2 testing consortium: M Amen, Kerrie W Barry, John M Boyle, Cara E Brook,  
25  
26 452 Seunga Choo, L T Cornmesser, David J Dilworth, Jennifer A Doudna, Indro Fedrigo, Skyler E  
27  
28 453 Friedline, Thomas G W Graham, Ralph Green, Jennifer R Hamilton, Megan L Hochstrasser,  
29  
30 454 Dirk Hockemeyer, Netravathi Krishnappa, Azra Lari, Hanqin Li, Enrique Lin-Shiao, Tianlin Lu,  
31  
32 455 Elijah F Lyons, Kevin G Mark, Lisa Argento Martell, A Raquel O Martins, Patrick S Mitchell,  
33  
34 456 Erica A Moehle, Christine Naca, Divya Nandakumar, Elizabeth O'Brien, Derek J Pappas,  
35  
36 457 Kathleen Pestal, Diana L Quach, Benjamin E Rubin, Rohan Sachdeva, Elizabeth C Stahl,  
37  
38 458 Abdullah Muhammad Syed, I-Li Tan, Amy L Tollner, Connor A Tsuchida, C Kimberly Tsui,  
39  
40 459 Timothy K Turkalo, M Bryan Warf, Oscar N Whitney, and Lea B Witkowsky), and Vitalant  
41  
42 460 Research Institute (including but not limited to: Mars Stone, Chloe Thorbrogger, Alice Lee, and  
43  
44 461 Heather Tanner). The author would also like to thank Drs. Sandra McCoy, Stefano Bertozzi, and  
45  
46 462 Lauren Ralph for their feedback on this manuscript.  
47  
48  
49  
50

51 463 **Contributors:** LH performed statistical analyses and wrote the first draft of the manuscript. SW  
52  
53 464 performed phylogenomic analyses and prepared associated figures and paragraphs. AR and  
54  
55 465 MP designed the study and provided input on the manuscript. LP, SF, AH, GN, the IGI SARS-

1  
2  
3 466 CoV-2 Testing Consortium, CDG, and MB provided feedback on the study design and  
4  
5 467 manuscript. YL assisted with data analyses. All authors hold final responsibility for the decision  
6  
7 468 to submit for publication.  
8  
9

10 469 **Declaration of interests:** Vitalant Research Institute, of which Dr. Michael Busch is Director,  
11  
12 470 receives research funding and free assay kits from Ortho Clinical Diagnostics. Dr. Busch does  
13  
14 471 not receive salary support or personal compensation from Ortho Clinical Diagnostics. The  
15  
16 472 remaining authors declare no competing interests.  
17  
18

19 473 **Funding:** The study was funded by private donors who had no role in study design, data  
20  
21 474 collection, data analysis, data interpretation, or writing of the report.  
22  
23

24 475 **Data sharing:** De-identified data sets used in analyses and accompanying R Markdown script  
25  
26 476 files will be publicly available at the time of publication at the following link:  
27  
28 477 <https://github.com/lauren-hunter/bcsci>  
29  
30

31 478 **Ethical approvals:** All study activities were approved by the University of California, Berkeley  
32  
33 479 Committee for the Protection of Human Subjects (#2020-06-13349, #2020-05-13261, #2020-04-  
34  
35 480 13238).  
36  
37  
38  
39  
40  
41  
42  
43  
44  
45  
46  
47  
48  
49  
50  
51  
52  
53  
54  
55  
56  
57  
58  
59  
60

481

## References

1. The New York Times. Tracking the Coronavirus at U.S. Colleges and Universities. *The New York Times*. <https://www.nytimes.com/interactive/2020/us/covid-college-cases-tracker.html>. Published December 11, 2020. Accessed December 15, 2020.
2. Boehmer TK, DeVies J, Caruso E, et al. Changing Age Distribution of the COVID-19 Pandemic - United States, May-August 2020. *MMWR Morb Mortal Wkly Rep*. 2020;69(39):1404-1409. doi:10.15585/mmwr.mm6939e1
3. Salvatore PP. Recent Increase in COVID-19 Cases Reported Among Adults Aged 18–22 Years — United States, May 31–September 5, 2020. *MMWR Morb Mortal Wkly Rep*. 2020;69. doi:10.15585/mmwr.mm6939e4
4. Rossen LM, Branum AM, Ahmad FB, Sutton P, Anderson RN. Excess Deaths Associated with COVID-19, by Age and Race and Ethnicity — United States, January 26–October 3, 2020. *MMWR Morb Mortal Wkly Rep*. 2020;69(42):1522-1527. doi:10.15585/mmwr.mm6942e2
5. Moghadas SM, Fitzpatrick MC, Sah P, et al. The implications of silent transmission for the control of COVID-19 outbreaks. *PNAS*. 2020;117(30):17513-17515. doi:10.1073/pnas.2008373117
6. Ivory D, Gebeloff R, Mervosh S. Young People Have Less Covid-19 Risk, but in College Towns, Deaths Rose Fast. *The New York Times*. <https://www.nytimes.com/2020/12/12/us/covid-colleges-nursing-homes.html>. Published December 12, 2020. Accessed December 15, 2020.
7. Andersen MS, Bento AI, Basu A, Marsicano C, Simon K. College Openings, Mobility, and the Incidence of COVID-19 Cases. *medRxiv*. Published online September 23, 2020:2020.09.22.20196048. doi:10.1101/2020.09.22.20196048
8. Leidner AJ. Opening of Large Institutions of Higher Education and County-Level COVID-19 Incidence — United States, July 6–September 17, 2020. *MMWR Morb Mortal Wkly Rep*. 2021;70. doi:10.15585/mmwr.mm7001a4
9. Ferdinands JM. Waning 2-Dose and 3-Dose Effectiveness of mRNA Vaccines Against COVID-19–Associated Emergency Department and Urgent Care Encounters and Hospitalizations Among Adults During Periods of Delta and Omicron Variant Predominance — VISION Network, 10 States, August 2021–January 2022. *MMWR Morb Mortal Wkly Rep*. 2022;71. doi:10.15585/mmwr.mm7107e2
10. Yasmin F, Najeeb H, Moeed A, et al. COVID-19 Vaccine Hesitancy in the United States: A Systematic Review. *Front Public Health*. 2021;9:770985. doi:10.3389/fpubh.2021.770985
11. Boeshaghi AS, Tan FH, Renton B, Berger Z, Pachter L. Markedly heterogeneous COVID-19 testing plans among US colleges and universities. *medRxiv*. Published online August 11, 2020:2020.08.09.20171223. doi:10.1101/2020.08.09.20171223
12. Nadworny E, McMinn S. Even In COVID-19 Hot Spots, Many Colleges Aren't Aggressively Testing Students. NPR.org. Published October 6, 2020. Accessed January 7, 2021. <https://www.npr.org/2020/10/06/919159473/even-in-covid-hot-spots-many-colleges-arent-aggressively-testing-students>
13. Schultes O, Clarke V, Paltiel AD, Cartter M, Sosa L, Crawford FW. COVID-19 Testing and Case Rates and Social Contact Among Residential College Students in Connecticut During the 2020-2021 Academic Year. *JAMA Network Open*. 2021;4(12):e2140602. doi:10.1001/jamanetworkopen.2021.40602
14. Packel L, Reingold A, Hunter L, et al. Piloting an integrated SARS-CoV-2 testing and data system for outbreak containment among college students: A prospective cohort study. *PLOS ONE*. 2021;16(1):e0245765. doi:10.1371/journal.pone.0245765

- 1  
2  
3 529 15. von Elm E, Altman DG, Egger M, et al. The Strengthening the Reporting of Observational  
4 530 Studies in Epidemiology (STROBE) statement: guidelines for reporting observational  
5 531 studies. *Epidemiology*. 2007;18(6):800-804. doi:10.1097/EDE.0b013e3181577654  
6 532 16. Harris PA, Taylor R, Thielke R, Payne J, Gonzalez N, Conde JG. Research electronic data  
7 533 capture (REDCap)—A metadata-driven methodology and workflow process for providing  
8 534 translational research informatics support. *Journal of Biomedical Informatics*.  
9 535 2009;42(2):377-381. doi:10.1016/j.jbi.2008.08.010  
10 536 17. Harris PA, Taylor R, Minor BL, et al. The REDCap consortium: Building an international  
11 537 community of software platform partners. *Journal of Biomedical Informatics*.  
12 538 2019;95:103208. doi:10.1016/j.jbi.2019.103208  
13 539 18. Amen AM, Barry KW, Boyle JM, et al. Blueprint for a pop-up SARS-CoV-2 testing lab.  
14 540 *Nature Biotechnology*. 2020;38(7):791-797. doi:10.1038/s41587-020-0583-3  
15 541 19. Gohl DM, Garbe J, Grady P, et al. A rapid, cost-effective tailed amplicon method for  
16 542 sequencing SARS-CoV-2. *BMC Genomics*. 2020;21(1):863. doi:10.1186/s12864-020-  
17 543 07283-6  
18 544 20. Bushnell B. *BBMap*. <https://sourceforge.net/projects/bbmap>  
19 545 21. Hadfield J, Megill C, Bell SM, et al. Nextstrain: real-time tracking of pathogen evolution.  
20 546 *Bioinformatics*. 2018;34(23):4121-4123. doi:10.1093/bioinformatics/bty407  
21 547 22. Shu Y, McCauley J. GISAID: Global initiative on sharing all influenza data – from vision to  
22 548 reality. *Euro Surveill*. 2017;22(13):30494. doi:10.2807/1560-7917.ES.2017.22.13.30494  
23 549 23. Turakhia Y, Thornlow B, Hinrichs AS, et al. Ultrafast Sample Placement on Existing Trees  
24 550 (USHER) Empowers Real-Time Phylogenetics for the SARS-CoV-2 Pandemic. Published  
25 551 online September 28, 2020:2020.09.26.314971. doi:10.1101/2020.09.26.314971  
26 552 24. Ortho Clinical Diagnostics. INSTRUCTIONS FOR USE: VITROS Immunodiagnostic  
27 553 Products Anti-SARS-CoV-2 Total Reagent Pack, VITROS Immunodiagnostic Products  
28 554 Anti-SARS-CoV-2 Total Calibrator. Published 2020. Accessed January 7, 2021.  
29 555 <https://www.fda.gov/media/136967/download>  
30 556 25. Mantzari E, Vogt F, Shemilt I, Wei Y, Higgins JPT, Marteau TM. Personal financial  
31 557 incentives for changing habitual health-related behaviors: A systematic review and meta-  
32 558 analysis. *Prev Med*. 2015;75:75-85. doi:10.1016/j.ypmed.2015.03.001  
33 559 26. Facente SN, Hunter LA, Packel LJ, et al. Feasibility and effectiveness of daily temperature  
34 560 screening to detect COVID-19 in a prospective cohort at a large public university. *BMC*  
35 561 *Public Health*. 2021;21(1):1693. doi:10.1186/s12889-021-11697-6  
36 562 27. Liang KY, Zeger SL. Longitudinal Data Analysis Using Generalized Linear Models.  
37 563 *Biometrika*. 1986;73(1):13-22. doi:10.2307/2336267  
38 564 28. R Core Team. *R: A Language and Environment for Statistical Computing*. R Foundation for  
39 565 Statistical Computing; 2021. <https://www.R-project.org/>  
40 566 29. Gross EL. Ohio State University Suspends 228 Students For Violating Covid-19  
41 567 Guidelines. *Forbes*. [https://www.forbes.com/sites/elanagross/2020/08/24/ohio-state-](https://www.forbes.com/sites/elanagross/2020/08/24/ohio-state-university-suspends-228-students-for-violating-covid-19-guidelines/)  
42 568 [university-suspends-228-students-for-violating-covid-19-guidelines/](https://www.forbes.com/sites/elanagross/2020/08/24/ohio-state-university-suspends-228-students-for-violating-covid-19-guidelines/). Published August 24,  
43 569 2020. Accessed September 9, 2020.  
44 570 30. Giuliani-Hoffman F. Tulane students warned of suspension or expulsion for partying in  
45 571 groups larger than 15. *CNN*. [https://www.cnn.com/2020/07/09/us/tulane-students-group-](https://www.cnn.com/2020/07/09/us/tulane-students-group-gathering-coronavirus-trnd/index.html)  
46 572 [gathering-coronavirus-trnd/index.html](https://www.cnn.com/2020/07/09/us/tulane-students-group-gathering-coronavirus-trnd/index.html). Published July 12, 2020. Accessed September 9,  
47 573 2020.  
48 574 31. Treisman R. More Than 200 Ohio State University Students Suspended For Violating  
49 575 Pandemic Rules. *NPR.org*. Published August 25, 2020. Accessed September 9, 2020.  
50 576 [https://www.npr.org/sections/coronavirus-live-updates/2020/08/25/906039378/more-than-](https://www.npr.org/sections/coronavirus-live-updates/2020/08/25/906039378/more-than-200-ohio-state-university-students-suspended-for-violating-pandemic-ru)  
51 577 [200-ohio-state-university-students-suspended-for-violating-pandemic-ru](https://www.npr.org/sections/coronavirus-live-updates/2020/08/25/906039378/more-than-200-ohio-state-university-students-suspended-for-violating-pandemic-ru)  
52  
53  
54  
55  
56  
57  
58  
59  
60

- 1  
2  
3 578 32. Gold JM Jessica. Colleges Are Getting Ready to Blame Their Students. *The Atlantic*.  
4 579 [https://www.theatlantic.com/ideas/archive/2020/07/colleges-are-getting-ready-blame-their-](https://www.theatlantic.com/ideas/archive/2020/07/colleges-are-getting-ready-blame-their-students/614410/)  
5 580 [students/614410/](https://www.theatlantic.com/ideas/archive/2020/07/colleges-are-getting-ready-blame-their-students/614410/). Published July 21, 2020. Accessed September 8, 2020.  
6 581 33. Marcus J. Quarantine Fatigue Is Real. *The Atlantic*.  
7 582 [https://www.theatlantic.com/ideas/archive/2020/05/quarantine-fatigue-real-and-shaming-](https://www.theatlantic.com/ideas/archive/2020/05/quarantine-fatigue-real-and-shaming-people-wont-help/611482/)  
8 583 [people-wont-help/611482/](https://www.theatlantic.com/ideas/archive/2020/05/quarantine-fatigue-real-and-shaming-people-wont-help/611482/). Published May 11, 2020. Accessed September 8, 2020.  
9 584 34. Marcus J, Baral S. University leaders should take a more humane approach to students  
10 585 during COVID-19 (opinion) | Inside Higher Ed. Inside Higher Ed. Published October 15,  
11 586 2020. Accessed January 8, 2021.  
12 587 [https://www.insidehighered.com/views/2020/10/15/university-leaders-should-take-more-](https://www.insidehighered.com/views/2020/10/15/university-leaders-should-take-more-humane-approach-students-during-covid-19)  
13 588 [humane-approach-students-during-covid-19](https://www.insidehighered.com/views/2020/10/15/university-leaders-should-take-more-humane-approach-students-during-covid-19)  
14 589 35. Housing | UC Berkeley | University of California, Berkeley. Accessed January 11, 2021.  
15 590 <https://admissions.berkeley.edu/housing>  
16 591 36. Colleges Let Students Go Unmasked Even With Covid Bearing Down. *Bloomberg.com*.  
17 592 [https://www.bloomberg.com/news/articles/2021-11-23/colleges-drop-indoor-mask-rules-](https://www.bloomberg.com/news/articles/2021-11-23/colleges-drop-indoor-mask-rules-despite-holiday-covid-threat)  
18 593 [despite-holiday-covid-threat](https://www.bloomberg.com/news/articles/2021-11-23/colleges-drop-indoor-mask-rules-despite-holiday-covid-threat). Published November 23, 2021. Accessed February 14, 2022.  
19 594 37. Saul S, Hartocollis A. Some Colleges Loosen Rules for a Virus That Won't Go Away. *The*  
20 595 *New York Times*. [https://www.nytimes.com/2022/01/16/us/politics/colleges-covid-](https://www.nytimes.com/2022/01/16/us/politics/colleges-covid-coronavirus.html)  
21 596 [coronavirus.html](https://www.nytimes.com/2022/01/16/us/politics/colleges-covid-coronavirus.html). Published January 16, 2022. Accessed February 14, 2022.  
22 597  
23  
24  
25  
26  
27  
28  
29  
30  
31  
32  
33  
34  
35  
36  
37  
38  
39  
40  
41  
42  
43  
44  
45  
46  
47  
48  
49  
50  
51  
52  
53  
54  
55  
56  
57  
58  
59  
60

**Figure 1.** Phylogeny of outbreak-associated strain of SARS-CoV-2 among participants in the Safe Campus Initiative.

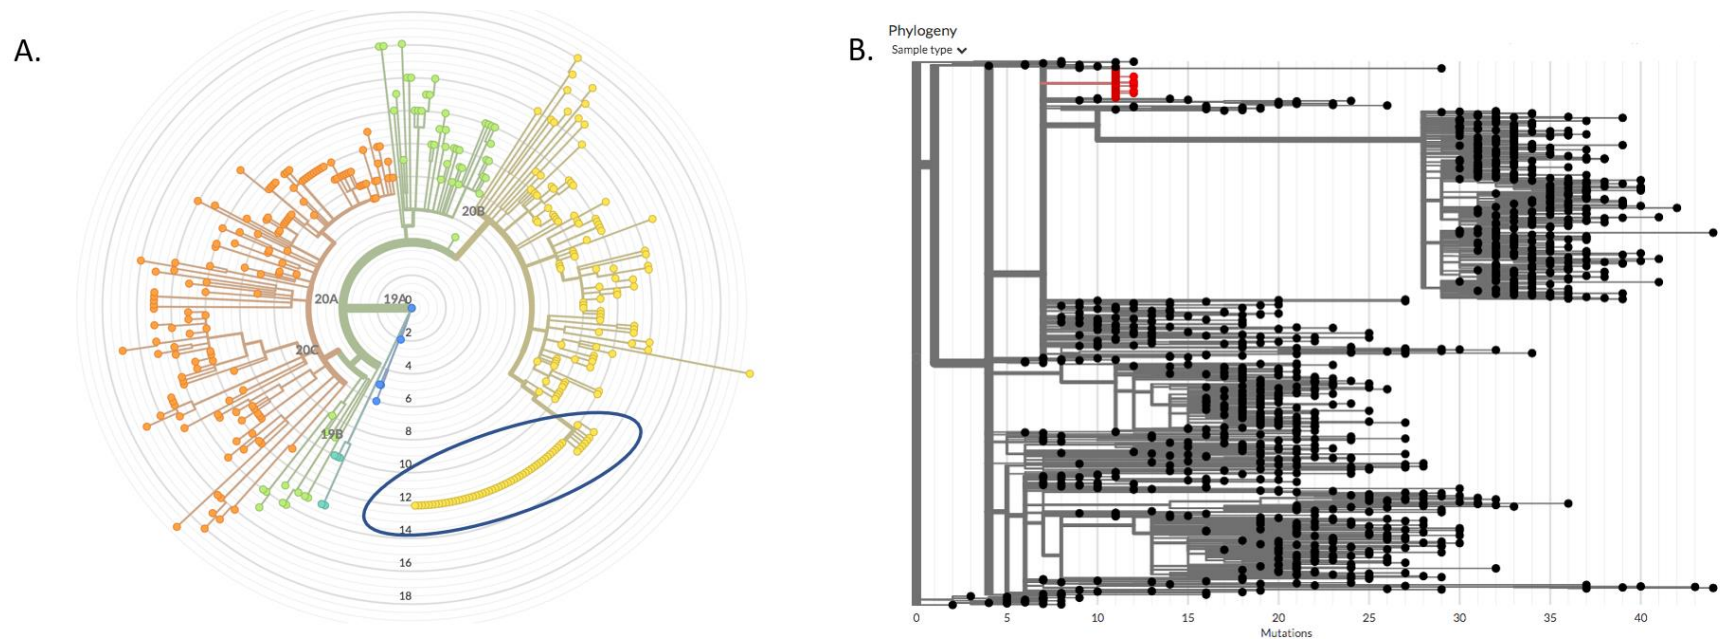

**A.** A maximum likelihood phylogeny constructed from 357 genomes sequenced by the Innovative Genomics Institute between May and July 2020 constructed using Nextstrain. Branch lengths represent divergence from Wuhan reference genome at center. Blue circle marks cluster of identical genomes from a campus super-spreader event.

**B.** A 1,057 node subtree of a neighbor-joining tree constructed with all SARS-CoV-2 sequences to date (constructed using UShER with over 1 million genomes in April 2021), showing the most similar genomes to the super-spreader event cluster (in red). There are no descendant branches from the cluster, demonstrating that the outbreak was contained and the lineage died out.

**Supplementary Table 1.** Eligibility criteria across Berkeley COVID-19 Safe Campus Study cohorts.

|                             | <b>Student Cohort</b>                                                                                                                      | <b>Essential Worker Cohort</b>                                                                                                                                                                                                                                                                                                                                                    | <b>Faculty/Staff Cohort</b>                                                                                                                                  |
|-----------------------------|--------------------------------------------------------------------------------------------------------------------------------------------|-----------------------------------------------------------------------------------------------------------------------------------------------------------------------------------------------------------------------------------------------------------------------------------------------------------------------------------------------------------------------------------|--------------------------------------------------------------------------------------------------------------------------------------------------------------|
| <b>Eligibility Criteria</b> | - At least 18 years of age                                                                                                                 | - At least 18 years of age                                                                                                                                                                                                                                                                                                                                                        | - At least 18 years of age                                                                                                                                   |
|                             | - Currently enrolled as an undergraduate or graduate student at UC Berkeley (i.e., not graduated in Spring 2020 or incoming for Fall 2020) | - Currently employed in one of the following departments at UC Berkeley: health services, police, facility services or other building management, environmental health and safety, laboratory animal care, athletics, dining, childcare, other residential or student services<br><br>- Currently working on campus at UC Berkeley or expected to return to work during June 2020 | - Currently employed as a faculty member, staff member, or postdoctoral scholar at UC Berkeley<br><br>- Not already enrolled in the essential workers cohort |
|                             | - Primarily residing in Alameda County or Contra Costa Country between 6/1/20-8/31/20                                                      | N/A                                                                                                                                                                                                                                                                                                                                                                               | - Primarily residing in Alameda County or Contra Costa Country between 6/1/20-8/31/20                                                                        |
|                             | - Willing to sign release of information for COVID-19-related medical records                                                              | - Willing to sign release of information for COVID-19-related medical records                                                                                                                                                                                                                                                                                                     | - Willing to sign release of information for COVID-19-related medical records                                                                                |

**Supplementary Figure 1.** Flow diagram for Berkeley COVID-19 Safe Campus Study cohorts.

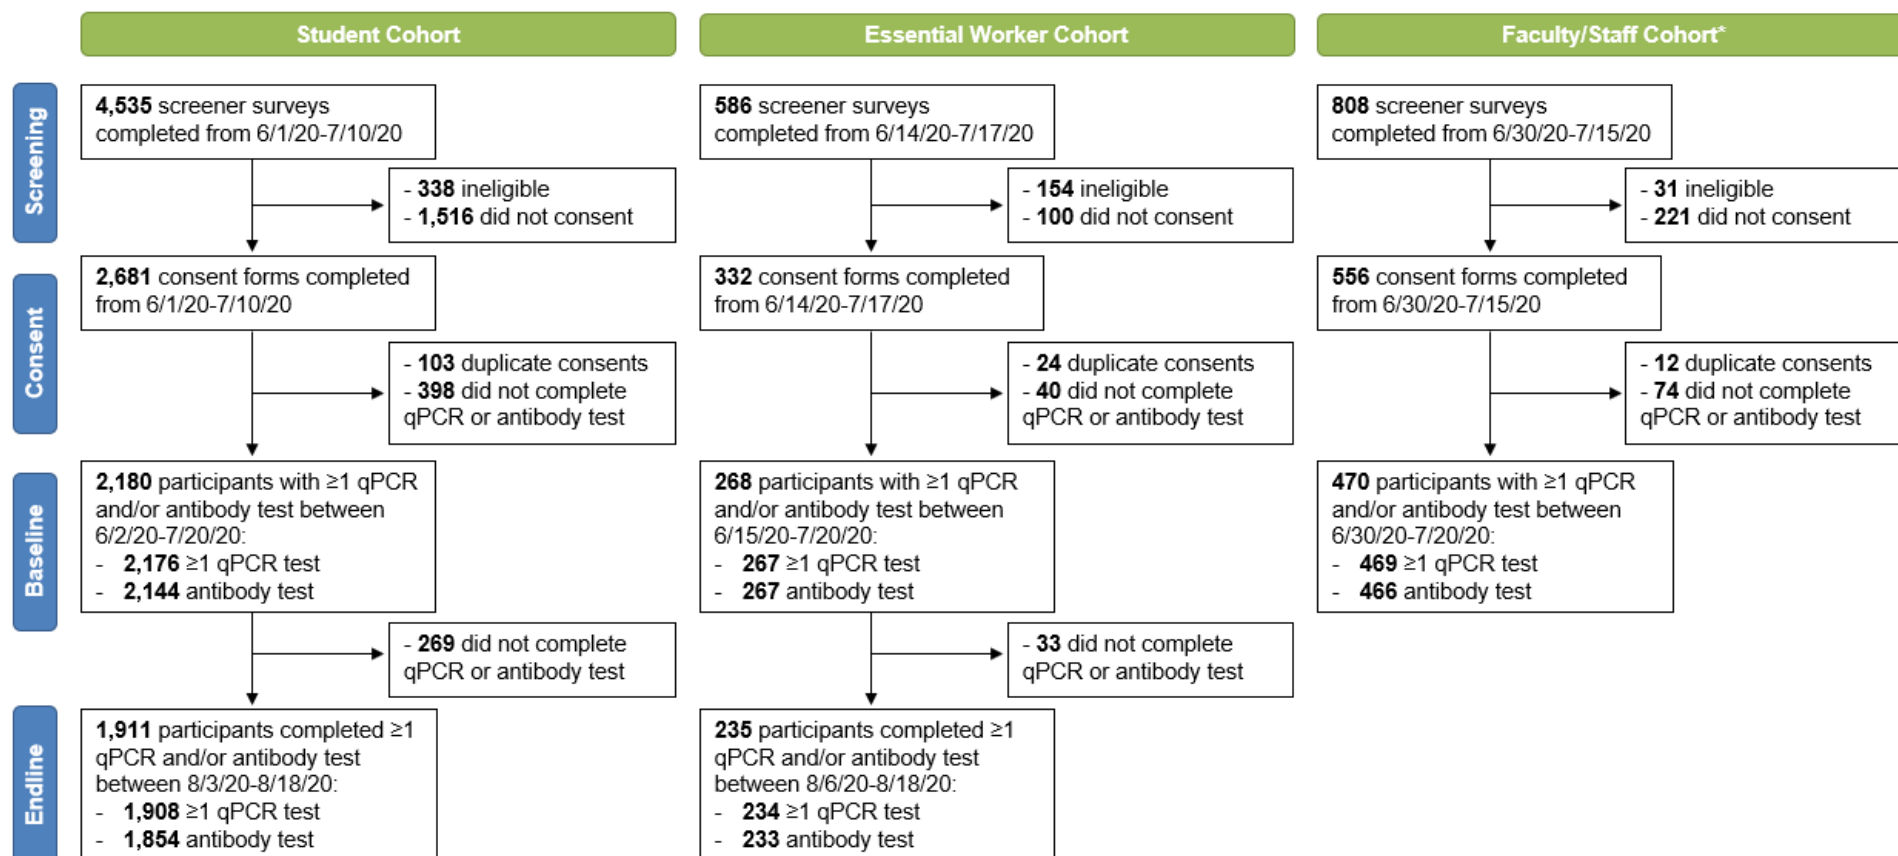

qPCR: quantitative polymerase chain reaction.

\*Faculty/staff cohort not invited for endline testing appointments but could complete follow-up qPCR tests through 8/18/20.



**STROBE 2007 (v4) Statement—Checklist of items that should be included in reports of *cohort studies***

| Section/Topic                | Item # | Recommendation                                                                                                                                                                       | Reported on page #          |
|------------------------------|--------|--------------------------------------------------------------------------------------------------------------------------------------------------------------------------------------|-----------------------------|
| <b>Title and abstract</b>    | 1      | (a) Indicate the study's design with a commonly used term in the title or the abstract                                                                                               | 1-2                         |
|                              |        | (b) Provide in the abstract an informative and balanced summary of what was done and what was found                                                                                  | 2                           |
| <b>Introduction</b>          |        |                                                                                                                                                                                      |                             |
| Background/rationale         | 2      | Explain the scientific background and rationale for the investigation being reported                                                                                                 | 4-5                         |
| Objectives                   | 3      | State specific objectives, including any prespecified hypotheses                                                                                                                     | 5                           |
| <b>Methods</b>               |        |                                                                                                                                                                                      |                             |
| Study design                 | 4      | Present key elements of study design early in the paper                                                                                                                              | 5                           |
| Setting                      | 5      | Describe the setting, locations, and relevant dates, including periods of recruitment, exposure, follow-up, and data collection                                                      | 5-9, Supplementary Figure 1 |
| Participants                 | 6      | (a) Give the eligibility criteria, and the sources and methods of selection of participants. Describe methods of follow-up                                                           | 5-9, Supplementary Table 1  |
|                              |        | (b) For matched studies, give matching criteria and number of exposed and unexposed                                                                                                  | N/A                         |
| Variables                    | 7      | Clearly define all outcomes, exposures, predictors, potential confounders, and effect modifiers. Give diagnostic criteria, if applicable                                             | 6-10                        |
| Data sources/<br>measurement | 8*     | For each variable of interest, give sources of data and details of methods of assessment (measurement). Describe comparability of assessment methods if there is more than one group | 6-10                        |
| Bias                         | 9      | Describe any efforts to address potential sources of bias                                                                                                                            | 10                          |
| Study size                   | 10     | Explain how the study size was arrived at                                                                                                                                            | 6                           |
| Quantitative variables       | 11     | Explain how quantitative variables were handled in the analyses. If applicable, describe which groupings were chosen and why                                                         | 10                          |
| Statistical methods          | 12     | (a) Describe all statistical methods, including those used to control for confounding                                                                                                | 10                          |
|                              |        | (b) Describe any methods used to examine subgroups and interactions                                                                                                                  | N/A                         |
|                              |        | (c) Explain how missing data were addressed                                                                                                                                          | N/A                         |
|                              |        | (d) If applicable, explain how loss to follow-up was addressed                                                                                                                       | N/A                         |
|                              |        | (e) Describe any sensitivity analyses                                                                                                                                                | N/A                         |

|                          |     |                                                                                                                                                                                                              |                        |
|--------------------------|-----|--------------------------------------------------------------------------------------------------------------------------------------------------------------------------------------------------------------|------------------------|
| <b>Results</b>           |     |                                                                                                                                                                                                              |                        |
| Participants             | 13* | (a) Report numbers of individuals at each stage of study—eg numbers potentially eligible, examined for eligibility, confirmed eligible, included in the study, completing follow-up, and analysed            | Supplementary Figure 1 |
|                          |     | (b) Give reasons for non-participation at each stage                                                                                                                                                         | Supplementary Figure 1 |
|                          |     | (c) Consider use of a flow diagram                                                                                                                                                                           | Supplementary Figure 1 |
| Descriptive data         | 14* | (a) Give characteristics of study participants (eg demographic, clinical, social) and information on exposures and potential confounders                                                                     | 11, Table 1            |
|                          |     | (b) Indicate number of participants with missing data for each variable of interest                                                                                                                          | 11-13                  |
|                          |     | (c) Summarise follow-up time (eg, average and total amount)                                                                                                                                                  | 11                     |
| Outcome data             | 15* | Report numbers of outcome events or summary measures over time                                                                                                                                               | 12                     |
| Main results             | 16  | (a) Give unadjusted estimates and, if applicable, confounder-adjusted estimates and their precision (eg, 95% confidence interval). Make clear which confounders were adjusted for and why they were included | 12-14, Tables 2-3      |
|                          |     | (b) Report category boundaries when continuous variables were categorized                                                                                                                                    | 10, Table 3            |
|                          |     | (c) If relevant, consider translating estimates of relative risk into absolute risk for a meaningful time period                                                                                             | N/A                    |
| Other analyses           | 17  | Report other analyses done—eg analyses of subgroups and interactions, and sensitivity analyses                                                                                                               | N/A                    |
| <b>Discussion</b>        |     |                                                                                                                                                                                                              |                        |
| Key results              | 18  | Summarise key results with reference to study objectives                                                                                                                                                     | 14-15                  |
| <b>Limitations</b>       |     |                                                                                                                                                                                                              |                        |
| Interpretation           | 20  | Give a cautious overall interpretation of results considering objectives, limitations, multiplicity of analyses, results from similar studies, and other relevant evidence                                   | 14-17                  |
| Generalisability         | 21  | Discuss the generalisability (external validity) of the study results                                                                                                                                        | 16                     |
| <b>Other information</b> |     |                                                                                                                                                                                                              |                        |
| Funding                  | 22  | Give the source of funding and the role of the funders for the present study and, if applicable, for the original study on which the present article is based                                                | 19                     |

\*Give information separately for cases and controls in case-control studies and, if applicable, for exposed and unexposed groups in cohort and cross-sectional studies.

# BMJ Open

## Monitoring SARS-CoV-2 incidence and seroconversion among university students and employees: a longitudinal cohort study in California, June to August 2020

|                                 |                                                                                                                                                                                                                                                                                                                                                                                                                                                                                                                                                                                                                                                                                                                                                                                                                                                                                                                                                                                                                                                 |
|---------------------------------|-------------------------------------------------------------------------------------------------------------------------------------------------------------------------------------------------------------------------------------------------------------------------------------------------------------------------------------------------------------------------------------------------------------------------------------------------------------------------------------------------------------------------------------------------------------------------------------------------------------------------------------------------------------------------------------------------------------------------------------------------------------------------------------------------------------------------------------------------------------------------------------------------------------------------------------------------------------------------------------------------------------------------------------------------|
| Journal:                        | <i>BMJ Open</i>                                                                                                                                                                                                                                                                                                                                                                                                                                                                                                                                                                                                                                                                                                                                                                                                                                                                                                                                                                                                                                 |
| Manuscript ID                   | bmjopen-2022-063999.R1                                                                                                                                                                                                                                                                                                                                                                                                                                                                                                                                                                                                                                                                                                                                                                                                                                                                                                                                                                                                                          |
| Article Type:                   | Original research                                                                                                                                                                                                                                                                                                                                                                                                                                                                                                                                                                                                                                                                                                                                                                                                                                                                                                                                                                                                                               |
| Date Submitted by the Author:   | 17-Feb-2023                                                                                                                                                                                                                                                                                                                                                                                                                                                                                                                                                                                                                                                                                                                                                                                                                                                                                                                                                                                                                                     |
| Complete List of Authors:       | Hunter, Lauren; University of California Berkeley, School of Public Health<br>Wyman, Stacia; University of California Berkeley, Innovative Genomics Institute<br>Packel, Laura; University of California Berkeley, School of Public Health<br>Facente, Shelley; University of California Berkeley, School of Public Health; Facente Consulting,<br>Li, Yi; University of California Berkeley, School of Public Health<br>Harte, Anna; University of California Berkeley, University Health Services<br>Nicolette, Guy; University of California Berkeley, University Health Services<br>the IGI SARS-CoV-2 Testing Consortium, N/A; University of California Berkeley, Innovative Genomics Institute<br>Di Germanio, Clara; Vitalant Research Institute<br>Busch, Michael; Vitalant Research Institute; University of California San Francisco, Department of Laboratory Medicine<br>Reingold, Art; University of California Berkeley, School of Public Health<br>Petersen, Maya L.; University of California Berkeley, School of Public Health |
| <b>Primary Subject Heading</b>: | Epidemiology                                                                                                                                                                                                                                                                                                                                                                                                                                                                                                                                                                                                                                                                                                                                                                                                                                                                                                                                                                                                                                    |
| Secondary Subject Heading:      | Public health, Infectious diseases                                                                                                                                                                                                                                                                                                                                                                                                                                                                                                                                                                                                                                                                                                                                                                                                                                                                                                                                                                                                              |
| Keywords:                       | COVID-19, EPIDEMIOLOGY, Public health < INFECTIOUS DISEASES, Infection control < INFECTIOUS DISEASES, Epidemiology < INFECTIOUS DISEASES, PUBLIC HEALTH                                                                                                                                                                                                                                                                                                                                                                                                                                                                                                                                                                                                                                                                                                                                                                                                                                                                                         |
|                                 |                                                                                                                                                                                                                                                                                                                                                                                                                                                                                                                                                                                                                                                                                                                                                                                                                                                                                                                                                                                                                                                 |

SCHOLARONE™  
Manuscripts



I, the Submitting Author has the right to grant and does grant on behalf of all authors of the Work (as defined in the below author licence), an exclusive licence and/or a non-exclusive licence for contributions from authors who are: i) UK Crown employees; ii) where BMJ has agreed a CC-BY licence shall apply, and/or iii) in accordance with the terms applicable for US Federal Government officers or employees acting as part of their official duties; on a worldwide, perpetual, irrevocable, royalty-free basis to BMJ Publishing Group Ltd ("BMJ") its licensees and where the relevant Journal is co-owned by BMJ to the co-owners of the Journal, to publish the Work in this journal and any other BMJ products and to exploit all rights, as set out in our [licence](#).

The Submitting Author accepts and understands that any supply made under these terms is made by BMJ to the Submitting Author unless you are acting as an employee on behalf of your employer or a postgraduate student of an affiliated institution which is paying any applicable article publishing charge ("APC") for Open Access articles. Where the Submitting Author wishes to make the Work available on an Open Access basis (and intends to pay the relevant APC), the terms of reuse of such Open Access shall be governed by a Creative Commons licence – details of these licences and which [Creative Commons](#) licence will apply to this Work are set out in our licence referred to above.

Other than as permitted in any relevant BMJ Author's Self Archiving Policies, I confirm this Work has not been accepted for publication elsewhere, is not being considered for publication elsewhere and does not duplicate material already published. I confirm all authors consent to publication of this Work and authorise the granting of this licence.

1  
2  
3 1 **Title:** Monitoring SARS-CoV-2 incidence and seroconversion among university students and  
4 employees: a longitudinal cohort study in California, June to August 2020  
5  
6

7  
8 3  
9 4 **Authors:** Lauren A. Hunter, MPH<sup>1</sup>; Stacia Wyman, PhD, MS<sup>2</sup>; Laura Packel, PhD<sup>1</sup>; Shelley  
10 Facente, PhD<sup>1,3-4</sup>; Yi Li, BS<sup>1</sup>; Anna Harte, MD<sup>5</sup>; Guy Nicolette, MD<sup>5</sup>; the IGI SARS-CoV-2  
11 Testing Consortium<sup>2</sup>; Clara Di Germanio, PhD<sup>4</sup>; Michael P. Busch, MD PhD<sup>4,6</sup>; Arthur Reingold,  
12  
13 6  
14 MD<sup>1</sup>; Maya Petersen, MD PhD<sup>1</sup>  
15  
16

17 8 <sup>1</sup> School of Public Health; University of California, Berkeley; Berkeley, CA  
18

19 9 <sup>2</sup> Innovative Genomics Institute; University of California, Berkeley; Berkeley, CA  
20

21 10 <sup>3</sup> Facente Consulting; Richmond, CA  
22

23 11 <sup>4</sup> Vitalant Research Institute; San Francisco, CA  
24

25 12 <sup>5</sup> University Health Services; University of California, Berkeley; Berkeley, CA  
26

27 13 <sup>6</sup> Department of Laboratory Medicine; University of California, San Francisco; San Francisco,  
28  
29 14 CA  
30

31  
32 15  
33 16 **Correspondence to:**

34 17 Ms. Lauren Hunter  
35

36 18 Division of Epidemiology and Biostatistics  
37

38 19 University of California, Berkeley School of Public Health  
39

40 20 2121 Berkeley Way #5302  
41

42 21 Berkeley, CA 94720  
43

44 22 [lahunter@berkeley.edu](mailto:lahunter@berkeley.edu)  
45  
46

47 23  
48

49 24 **Word count:** 4,213  
50

51 25 **Abstract word count:** 285  
52

53 26 **Number of tables/figures:** 5 (3 supplementary)  
54  
55  
56  
57  
58  
59  
60

## 27 **Abstract**

28 **Objectives:** To identify incident SARS-CoV-2 infections and inform effective mitigation  
29 strategies in university settings, we piloted an integrated symptom and exposure monitoring and  
30 testing system among a cohort of university students and employees.

31 **Design:** Prospective cohort study.

32 **Setting:** A public university in California from June to August 2020.

33 **Participants:** 2,180 university students and 738 university employees.

34 **Primary outcome measures:** At baseline and endline, we tested participants for active SARS-  
35 CoV-2 infection via quantitative polymerase chain reaction (qPCR) test and collected blood  
36 samples for antibody testing. Participants received notifications to complete additional qPCR  
37 tests throughout the study if they reported symptoms or exposures in daily surveys or were  
38 selected for surveillance testing. Viral whole genome sequencing was performed on positive  
39 qPCR samples, and phylogenetic trees were constructed with these genomes and external  
40 genomes.

41 **Results:** Over the study period, 57 students (2.6%) and 3 employees (0.4%) were diagnosed  
42 with SARS-CoV-2 infection via qPCR test. Phylogenetic analyses revealed that a super-  
43 spreader event among undergraduates in congregate housing accounted for at least 48% of  
44 cases but did not spread beyond campus. Test positivity was higher among participants who  
45 self-reported symptoms (incidence rate ratio [IRR]: 12.7; 95% confidence interval [CI]: 7.4, 21.8)  
46 or had household exposures (IRR: 10.3; 95% CI: 4.8, 22.0) that triggered notifications to test.  
47 Most (91%) participants with newly identified antibodies at endline had been diagnosed with  
48 incident infection via qPCR test during the study.

49 **Conclusions:** Our findings suggest that integrated monitoring systems can successfully identify  
50 and link at-risk students to SARS-CoV-2 testing. As the study took place before the evolution of  
51 highly transmissible variants and widespread availability of vaccines and rapid antigen tests,  
52 further research is necessary to adapt and evaluate similar systems in the present context.

### 53 **Strengths and limitations of this study**

- 54       • The study is strengthened by rich longitudinal data including more than 117,000 daily  
55       symptom surveys; 17,000 weekly exposure surveys; 7,600 qPCR tests to detect active  
56       SARS-CoV-2 infection; and 4,900 antibody tests to detect previous infection collected  
57       from 2,918 university students and employees over three months.
- 58       • We used seroconversion data from serial antibody tests and phylogenetic analyses  
59       comparing viral genome sequences to a broader database to evaluate the extent to  
60       which the study system identified incident cases and contained an outbreak among  
61       university students.
- 62       • Our identification of participants who seroconverted between baseline and endline may  
63       be incomplete due to loss-to-follow up and imperfect sensitivity of SARS-CoV-2 antibody  
64       testing.
- 65       • A high proportion of identified cases were traced to one outbreak, limiting the  
66       generalizability of our exploratory assessment of risk factors for incident infection. .

## 67 **Background**

68 Universities have been identified as hotspots for SARS-CoV-2 transmission in the United  
69 States,[1] where SARS-CoV-2 incidence is highest among young adults.[2] Young adults may  
70 be less likely to adhere to social distancing guidelines and more likely to experience workplace  
71 exposure (for example, at food service or retail jobs).[2] Their risk may be heightened in  
72 university settings where many live in congregate housing, interact with wide social networks, or  
73 attend large gatherings.[3] Although young adults are at low risk of serious acute illness or  
74 death from COVID-19 (the disease caused by SARS-CoV-2),[4] the higher likelihood of  
75 asymptomatic or mildly symptomatic infection in this age group makes young adults a key  
76 population through which SARS-CoV-2 may spread to other, more vulnerable groups.[2,5]  
77 Indeed, there is evidence that transmission among university students may lead to increased  
78 COVID-19-related mortality in the surrounding counties.[6–8] Although widespread vaccination  
79 has enabled campuses to return to in-person activities, the elimination of SARS-CoV-2  
80 transmission in campus populations may be stymied by vaccine hesitancy among students and  
81 employees and breakthrough infection and subsequent transmission by vaccinated persons,  
82 particularly in the context of waning immunity and viral variants which reduce vaccine  
83 efficacy.[9,10] Therefore, rapid and resource-efficient identification of incident cases in  
84 university populations is a critical first step of outbreak investigation and control, followed by  
85 isolation, case investigation, and contact tracing, to minimize transmission within campus and to  
86 the broader community.

87 Universities have adopted a wide range of approaches for testing and outbreak  
88 mitigation.[11–13] While a number of well-resourced universities have scaled up testing capacity  
89 in order to frequently test all students and employees accessing campus or living in university-  
90 affiliated housing,[13] many other universities do not have well-defined testing strategies or  
91 restrict testing to those with symptoms or known exposure.[12] Beyond investing in testing  
92 programs, some universities have sought to reduce on-campus transmission by mandating the



1  
2  
3 93 completion of self-administered symptom screening tools by students and employees. However,  
4  
5 94 such tools have primarily been used to regulate daily access to campus (i.e., deny entry to  
6  
7 95 those who report COVID-19-like symptoms), rather than to detect emergent outbreaks among  
8  
9 96 university populations. As universities resume normal operations and discontinue mitigation  
10  
11 97 strategies such as masking, non-punitive, resource-efficient strategies which can both identify  
12  
13 98 those who are at highest risk of infection *and* expediently link them to low-barrier testing  
14  
15 99 services may play a key role in transitioning from a “one-size-fits-all” approach of uniform testing  
16  
17  
18 100 to a sustainable monitoring paradigm.

19  
20 101 In 2020, we piloted an integrated symptom and exposure monitoring and testing system  
21  
22 102 designed to identify incident SARS-CoV-2 infections among a cohort of university students and  
23  
24 103 employees.[14] Here we describe the incidence and seroprevalence of SARS-CoV-2 infection  
25  
26 104 within this cohort to evaluate the extent to which incident infections were successfully detected  
27  
28 105 and contained over the study period, identify sociodemographic factors associated with incident  
29  
30 106 infection, and ascertain which self-reported symptoms and exposures tracked by the monitoring  
31  
32 107 system were predictive of test positivity, with the ultimate objective of informing monitoring and  
33  
34 108 testing strategies in university settings.  
35  
36

37 109

## 38 39 110 **Methods**

### 40 41 111 *Study design and setting*

42  
43 112 The study comprised three prospective cohorts of University of California, Berkeley  
44  
45 113 affiliates followed from June to August 2020: students, essential workers (i.e., employees  
46  
47 114 working on campus in health, facilities, or student services), and other employees (hereafter,  
48  
49 115 “faculty/staff”). We report the findings according to the Strengthening the Reporting of  
50  
51 116 Observational Studies in Epidemiology (STROBE) checklist for cohort studies.[15]  
52

53  
54 117 Throughout the study period, public health orders mandated the use of face coverings in  
55  
56 118 public and upheld many restrictions set forth by earlier shelter-in-place orders, while allowing  
57

1  
2  
3 119 phased reopening of certain businesses and activities.[16] UC Berkeley did not offer in-person  
4  
5 120 classes, and on-campus work was restricted to essential workers and a small subset of faculty,  
6  
7 121 staff, and student researchers. Although few students were living in on-campus residence halls,  
8  
9 122 many students continued to live in congregate living settings off campus, such as fraternities,  
10  
11 123 sororities, and co-operative housing. From June to August 2020, daily case counts in Alameda  
12  
13 124 County ranged from approximately 50 to 350 (0 to 17 within the city of Berkeley).[17]  
14  
15  
16 125

### 17 18 126 *Participant recruitment and eligibility*

19  
20 127 The study was promoted through targeted messages from university officials to campus  
21  
22 128 email listservs and social media platforms from early June to mid-July 2020. To increase reach  
23  
24 129 to students expected to be at higher risk of COVID-19, we also placed flyers in congregate living  
25  
26 130 settings and conducted in-person recruitment for student athletes who had resumed training on  
27  
28 131 campus. Participants were eligible to enroll in the study if they were at least 18 years of age,  
29  
30 132 were a current student or employee at UC Berkeley, and planned to live in or near Berkeley  
31  
32 133 during the summer of 2020. Specific eligibility criteria and enrollment windows varied by cohort  
33  
34 134 (Supplementary Table 1, Supplementary Figure 1).  
35  
36

37 135 Upon enrollment, participants were linked to an online baseline survey that collected  
38  
39 136 sociodemographic data and information about their COVID-19-related health history.  
40  
41 137 Participants were then referred to a baseline testing appointment at University Health Services  
42  
43 138 (UHS) which included a SARS-CoV-2 quantitative polymerase chain reaction (qPCR) test and  
44  
45 139 blood collection for antibody testing (procedures described below). To facilitate daily  
46  
47 140 temperature monitoring, study staff also provided participants with free oral thermometers upon  
48  
49 141 request at testing appointments. Participants who completed this appointment or a non-study  
50  
51 142 qPCR test at UHS by July 20 were eligible to remain in the study. We pre-specified a maximum  
52  
53 143 sample size of 4,000 participants across cohorts but did not reach this limit before the final day  
54  
55 144 of baseline data collection.  
56  
57  
58  
59  
60

1  
2  
3 1454  
5 146 *Symptom and exposure surveys*

6  
7 147 Participants received daily text messages or emails, depending on their preference  
8  
9 148 specified in the baseline survey, which linked to short symptom surveys through which they  
10  
11 149 reported their body temperature and any symptoms of illness. Once per week, the daily survey  
12  
13 150 included a longer exposure module, which asked about recent symptoms of illness among their  
14  
15 151 household member(s), potential exposure(s) to COVID-19, and activities related to potential  
16  
17 152 COVID-19 risk. All surveys were administered via REDCap.[18,19]

18  
19  
20 15321  
22 154 *Endline survey and testing*

23  
24 155 In early August, participants were sent an endline survey which collected updated  
25  
26 156 information on their COVID-19 history to identify any diagnoses outside of the study.  
27  
28 157 Participants in the student and essential worker cohorts were also invited to complete endline  
29  
30 158 testing appointments by August 18, including a final qPCR test and blood collection.

31  
32 15933  
34 160 *qPCR testing*

35  
36 161 Midturbinate nasal and oral swabs were collected by UHS clinical staff and tested for  
37  
38 162 SARS-CoV-2 by qPCR at the Innovative Genomics Institute (IGI).[20] qPCR tests were  
39  
40 163 performed at baseline for all three cohorts and at endline for the student and essential worker  
41  
42 164 cohorts. Between baseline and endline testing, additional qPCR tests were performed for the  
43  
44 165 following reasons:

- 45  
46  
47 166 • **Symptom- or exposure-based tests triggered based on participants' responses in**  
48  
49 167 **daily surveys:** Participants who reported COVID-19-like signs or symptoms<sup>1</sup> (in

---

54  
55 <sup>1</sup> Signs or symptoms which triggered a testing notification when reported were: temperature of  $\geq 100.4^{\circ}\text{F}$ , dry cough  
56 (without mucus), coughing up mucus, feeling feverish, unusual pain or pressure in the chest, difficulty breathing,  
57 shortness of breath, unexplained trouble thinking or concentrating, loss of sense of taste, or loss of sense of smell.

- 1  
2  
3 168 themselves or household member(s)) or who reported a suspected or confirmed COVID-  
4  
5 169 19 case in their household were automatically notified to sign up for a qPCR test.  
6  
7 170 • **Random surveillance testing:** A subset of participants in the student and faculty/staff  
8  
9 171 cohorts who had not had a qPCR test within a week were randomly selected and  
10  
11 172 emailed notifications to come in for surveillance testing in July.  
12  
13 173 • **Address-based surveillance testing:** Participants who lived at the same address as  
14  
15 174 another participant who tested positive for SARS-CoV-2 were immediately emailed  
16  
17 175 surveillance testing notifications. Following an outbreak among group-housed students  
18  
19 176 in early July, surveillance testing notifications were also emailed to all participants who  
20  
21 177 had not been tested within the week and who reported living in fraternities, sororities, or  
22  
23 178 co-operative housing.  
24  
25 179 • **Participant-initiated testing:** Participants could self-schedule study testing  
26  
27 180 appointments on demand, with or without consulting a healthcare provider and  
28  
29 181 regardless of exposure history.  
30  
31

32 182 Participants with positive qPCR test results were informed by phone by UHS clinical staff, who  
33  
34 183 provided guidance on isolation and performed case investigation to identify potential contacts.  
35  
36 184 Participants with negative qPCR test results were informed of their results via the UHS online  
37  
38 185 patient portal.  
39  
40

41 186

#### 43 187 *SARS-CoV-2 sequencing and phylogenetic analyses*

45 188 Viral whole genome sequencing was performed on a set of positive samples at the IGI,  
46  
47 189 using previously described procedures.[21] Briefly, SARS-CoV-2 RNA extracted from swabs  
48  
49 190 was reverse transcribed using SuperScript IV (Invitrogen), and the viral genome was amplified  
50  
51 191 from the resulting cDNA in four separate qPCR reactions using distinct primer sets tiling the  
52  
53 192 SARS-CoV-2 genome. The four qPCR reactions were pooled 1:1:1:1 and diluted 1:50 in H<sub>2</sub>O. A  
54  
55 193 second qPCR reaction was set up to add Nextera Unique Dual Indexing (UDI) sequences to  
56  
57  
58  
59  
60

1  
2  
3 194 either end of the amplicons. The resulting qPCR reaction was cleaned up using 0.7x AMPureXP  
4  
5 195 beads (Beckman Coulter) and quantified using a Qubit dsDNA HS Assay Kit (Thermo Fisher).  
6  
7 196 The libraries were then pooled to an equimolar ratio and sequenced with a 10% PhiX spike in  
8  
9 197 using a MiSeq v3 kit at 300bp PE reads.

11 198 Fastq sequencing files were processed through a custom pipeline using publicly  
12  
13 199 available software. The reads were preprocessed by quality trimming, removing adaptors, and  
14  
15 200 PhiX cleaning with BBTtools,[22] and then aligned to the Wuhan reference sequence  
16  
17 201 (NC\_045512.2) with minimap2 v2.16-r922. ARTICv3 primers were trimmed, and the consensus  
18  
19 202 sequence was built with iVar v1.3.1, where an 'N' is called if the depth is less than 10 reads at  
20  
21 203 any nucleotide. The genomes were then processed through the Nextstrain Auger pipeline with  
22  
23 204 other genomes from GISAID to construct a maximum likelihood tree.[23,24] Several  
24  
25 205 phylogenies were constructed for this analysis: a tree of 7,091 genomes subsampled from the  
26  
27 206 worldwide genomes in GISAID at the time (approximately 200,000 genomes as of October  
28  
29 207 2020) was used to place the IGI genomes in the larger tree; a tree with all IGI genomes  
30  
31 208 sequenced at the time of analysis (356 genomes); and a tree containing 500 genomes (from 1  
32  
33 209 million genomes as of April 2021) was constructed using UShER.[25]  
34  
35  
36  
37  
38

### 39 211 *Antibody testing*

40  
41 212 Up to 10 mL of blood was collected by phlebotomists via venipuncture at baseline from  
42  
43 213 participants in all three cohorts and again at endline from participants in the student and  
44  
45 214 essential worker cohorts. Blood was centrifuged and serum was stored at -20°C for 2 to 4  
46  
47 215 months before being tested at Vitalant Research Institute using the VITROS Immunodiagnostic  
48  
49 216 Products Anti-SARS-CoV-2 Total Reagent Pack, which detects IgA, IgG, and IgM antibodies  
50  
51 217 against the SARS-CoV-2 spike protein S1 antigen and has an estimated clinical specificity of  
52  
53 218 100% and unreported sensitivity.[26]  
54  
55  
56  
57  
58  
59  
60

220 *Participant compensation*

221 Participants in the student cohort received a \$50 gift card after completing baseline  
222 testing and 10 daily surveys; this incentive was conditional on daily survey completion to  
223 encourage early habit formation.[27] Student participants received a second \$50 gift card at  
224 their endline testing appointment. To facilitate travel to and from UHS for testing appointments,  
225 student participants were also offered pre-paid car rides via a ride-sharing app.

226 Participants in the essential worker cohort received a gift card worth \$1 per daily survey  
227 completed (to a maximum of \$70) after the study ended. Participants in the faculty/staff cohort  
228 were not compensated.

230 *Statistical analyses*

231 To identify sociodemographic factors associated with incident infection, we used Poisson  
232 regression to estimate unadjusted incidence rate ratios (IRRs) for SARS-CoV-2 infection by  
233 study cohort and within strata of sociodemographic variables self-reported in the baseline  
234 survey (e.g., age, gender, housing type), setting person-months of enrollment as an offset term  
235 to account for differing lengths of follow-up.

236 We also calculated IRRs comparing test positivity by recent signs/symptoms, exposures,  
237 and activities reported in the daily and weekly surveys. We estimated IRRs for several  
238 temperature thresholds (i.e.,  $\geq 100.4^{\circ}\text{F}$ ,  $\geq 100.0^{\circ}\text{F}$ ,  $\geq 99.0^{\circ}\text{F}$ ) to compare to symptom-specific  
239 IRRs; however, continuous associations between temperature and positivity have been  
240 previously explored in this cohort, finding that temperature screening has low sensitivity to  
241 SARS-CoV-2 infection and, thus, limited efficacy as a primary means of detection.[28] While it  
242 was not possible to isolate participants' specific reason(s) for testing over the study period (e.g.,  
243 participants could receive symptom- and/or exposure-triggered testing notifications over the  
244 same time window in which they completed baseline or endline testing), we linked qPCR test  
245 results to recently-completed symptom and exposure surveys to identify testing appointments

1  
2  
3 246 that took place in the days or weeks following symptom- and exposure-triggered testing  
4  
5 247 notifications (Supplementary Figure 2). We accounted for clustered observations due to  
6  
7 248 repeated tests per participant using a generalized estimating equation approach with Huber-  
8  
9 249 White standard error estimates and an exchangeable working correlation structure.[29]

11 250 Finally, to assess the extent to which the testing and monitoring system captured  
12  
13 251 incident infections, we identified participants who seroconverted from having non-reactive (no  
14  
15 252 antibodies detected) to reactive (antibodies detected) blood samples between baseline and  
16  
17 253 endline and calculated the proportion of these participants who were also diagnosed with  
18  
19 254 incident SARS-CoV-2 infection via positive qPCR test during the study period. Analyses were  
20  
21 255 conducted in R version 4.2.1.[30]  
22  
23

24 256

### 26 257 *Ethical approvals*

28 258 All study activities were approved by the University of California, Berkeley Committee for  
29  
30 259 the Protection of Human Subjects (#2020-06-13349, #2020-05-13261, #2020-04-13238).  
31  
32

33 260

### 35 261 *Patient and public involvement*

37 262 The study's target population comprised university students and employees. While the  
38  
39 263 study was conducted by faculty, staff, and graduate students from the UC Berkeley School of  
40  
41 264 Public Health, University Health Services, and the Innovative Genomics Institute, the broader  
42  
43 265 student body and university workforce were not involved in designing the study or selecting the  
44  
45 266 research question, outcome measures, or method of disseminating results.  
46

47 267

## 50 268 **Results**

### 52 269 *Participant recruitment and retention*

54 270 Between June 1 and July 20, 2020, we enrolled 2,180 students, 268 essential workers,  
55  
56 271 and 470 faculty/staff who completed at least one qPCR test or antibody test (Table 1,  
57  
58  
59  
60

272 Supplementary Figure 1). The student cohort was split between undergraduate (52%) and  
 273 graduate (48%) students. Nearly half (44%) of essential workers worked in health services.  
 274 While 85% of essential workers were working on campus at the time of enrollment, most (81%)  
 275 faculty/staff were working entirely remotely. At the time of enrollment, only 12 (0.4%)  
 276 participants reported a previous COVID-19 diagnosis.

277 Participants provided a total of 5,545 person-months of follow-up from enrollment to the  
 278 end of the study (mean person-days per participant: 57, range: 32-78). Participants completed a  
 279 mean of 40 daily symptom surveys and 6 weekly exposure surveys over the study period, for a  
 280 total of 117,239 symptom and 17,162 exposure surveys. A subset of participants did not  
 281 complete any daily symptom surveys (1.7%) or weekly exposure surveys (4.2%).

282 **Table 1.** Baseline characteristics of participants in the Berkeley COVID-19 Safe Campus  
 283 Initiative by study cohort, June-August 2020.

|                                             | All             | Students       | Essential Workers | Faculty/Staff   |
|---------------------------------------------|-----------------|----------------|-------------------|-----------------|
| N (row %)                                   | 2,918 (100)     | 2,180 (74.7)   | 268 (9.2)         | 470 (16.1)      |
| Age, mean $\pm$ SD                          | 29.4 $\pm$ 11.6 | 24.3 $\pm$ 5.4 | 42.5 $\pm$ 12.3   | 45.2 $\pm$ 12.3 |
| Gender, n (column %)                        |                 |                |                   |                 |
| Man                                         | 1,177 (40.3)    | 911 (41.8)     | 103 (38.4)        | 163 (34.7)      |
| Woman                                       | 1,653 (56.6)    | 1,187 (54.4)   | 164 (61.2)        | 302 (64.3)      |
| Non-binary/other                            | 51 (1.7)        | 46 (2.1)       | 1 (0.4)           | 4 (0.9)         |
| Race/ethnicity, n (column %)*               |                 |                |                   |                 |
| American Indian/Alaska Native               | 39 (1.3)        | 29 (1.3)       | 2 (0.7)           | 8 (1.7)         |
| Asian/Pacific Islander                      | 833 (28.5)      | 703 (32.2)     | 66 (24.6)         | 64 (13.6)       |
| Black/African American                      | 103 (3.5)       | 83 (3.8)       | 16 (6.0)          | 4 (0.9)         |
| Hispanic/Latine/Spanish origin              | 420 (14.4)      | 346 (15.9)     | 39 (14.6)         | 35 (7.4)        |
| White                                       | 1,814 (62.2)    | 1,261 (57.8)   | 160 (59.7)        | 393 (83.6)      |
| Other                                       | 280 (9.6)       | 223 (10.2)     | 31 (11.6)         | 26 (5.5)        |
| Program level, n (column %)                 |                 |                |                   |                 |
| Undergraduate                               | -               | 1,114 (51.7)   | -                 | -               |
| Graduate                                    | -               | 1,039 (48.2)   | -                 | -               |
| Living at fraternity/sorority, n (column %) | -               | 125 (5.7%)     | -                 | -               |
| Education, n (column %)                     |                 |                |                   |                 |
| High school diploma/GED                     | -               | -              | 6 (2.2)           | 0 (0)           |
| Some college or trade school                | -               | -              | 59 (22.0)         | 13 (2.8)        |
| Bachelor's degree                           | -               | -              | 78 (29.1)         | 119 (25.3)      |
| Graduate/professional degree                | -               | -              | 121 (45.1)        | 337 (71.7)      |



|                                                  |            |            |            |            |
|--------------------------------------------------|------------|------------|------------|------------|
| Department, n (column %)                         |            |            |            |            |
| Health services                                  | -          | -          | 129 (48.1) | -          |
| Facilities/building services                     | -          | -          | 61 (22.8)  | -          |
| Student services/other                           | -          | -          | 77 (28.7)  | -          |
| Job title, n (column %)                          |            |            |            |            |
| Faculty                                          | -          | -          | -          | 110 (23.4) |
| Staff                                            | -          | -          | -          | 311 (66.2) |
| Postdoctoral scholar/other                       | -          | -          | -          | 49 (10.4)  |
| Currently working outside the home, n (column %) | 748 (25.6) | 418 (19.2) | 228 (85.1) | 102 (21.7) |
| Pre-enrollment COVID-19 diagnosis, n (column %)  | 12 (0.4)   | 8 (0.4)    | 1 (0.4)    | 3 (0.6)    |

\*Categories not mutually exclusive.

### SARS-CoV-2 incidence

During the study period, participants underwent 7,638 qPCR tests for active SARS-CoV-2 infection, with a mean of 2.6 tests per participant (range: 0-9). Almost all (99.9%) participants completed at least one qPCR test. Overall, 60 participants (2.0%) tested positive: 57 students, 2 essential workers, and 1 faculty/staff.

Among cohorts, students were at highest risk of incident infection over the study period (IRR students vs. faculty/staff: 5.8; 95% confidence interval [CI]: 1.3, 103.0). Due to the low number of cases outside of the student cohort, we examined additional risk factors for infections among students only (Table 2), finding higher rates of infection among students who were 18-19 years old (IRR vs. students  $\geq 22$  years: 8.3; 95% CI: 4.2, 17.5) and undergraduates (IRR vs. graduate students: 4.1; 95% CI: 2.2, 8.7). We also observed a higher incidence among white students (IRR: 2.8 vs. non-white students; 95% CI: 1.5, 5.5). These associations were largely driven by an outbreak among participants living in fraternities or sororities. Nearly one-quarter of participants living in fraternities or sororities were infected with SARS-CoV-2 during the study period (IRR vs. other students: 20.9; 95% CI: 12.3, 35.5), and these participants accounted for 49% of cases observed among student participants.

**Table 2.** Bivariate associations between sociodemographic characteristics and SARS-CoV-2 incidence among student participants in the Safe Campus Initiative, June-August 2020.

|                                    | Cases,<br>N (row %) | Non-Cases,<br>N (row %) | IRR (95% CI)      |
|------------------------------------|---------------------|-------------------------|-------------------|
| Overall*                           | 57 (2.6)            | 2,120 (97.4)            | -                 |
| Age                                |                     |                         |                   |
| 18-19 years                        | 21 (8.0)            | 243 (92.0)              | 8.3 (4.2, 17.5)   |
| 20-21 years                        | 24 (3.8)            | 607 (96.2)              | 4.2 (2.1, 8.6)    |
| ≥22 years                          | 12 (0.9)            | 1,270 (99.1)            | Reference         |
| Gender                             |                     |                         |                   |
| Woman                              | 37 (3.1)            | 1,147 (96.9)            | 1.5 (0.9, 2.6)    |
| Man                                | 19 (2.1)            | 892 (97.9)              | Reference         |
| Non-binary/other                   | 0 (0)               | 46 (100)                | -                 |
| Race/ethnicity**                   |                     |                         |                   |
| American Indian/Alaska Native      | 0 (0)               | 29 (100)                | -                 |
| Asian/Pacific Islander             | 11 (1.6)            | 691 (98.4)              | 0.5 (0.2, 0.9)    |
| Black/African American             | 1 (1.2)             | 82 (98.8)               | 0.5 (0.03, 2.0)   |
| Hispanic/Latine/Spanish origin     | 8 (2.3)             | 337 (97.7)              | 0.9 (0.4, 1.8)    |
| White                              | 45 (3.6)            | 1,216 (96.4)            | 2.8 (1.5, 5.5)    |
| Other                              | 4 (1.8)             | 217 (98.2)              | 0.7 (0.2, 1.6)    |
| Program level                      |                     |                         |                   |
| Undergraduate                      | 46 (4.1)            | 1,067 (95.9)            | 4.1 (2.2, 8.7)    |
| Graduate                           | 10 (1.0)            | 1,027 (99.0)            | Reference         |
| Living at fraternity/sorority      | 28 (22.4)           | 97 (77.6)               | 20.9 (12.3, 35.5) |
| Currently working outside the home | 6 (1.4)             | 410 (98.6)              | 0.5 (0.2, 1.1)    |

IRR: incidence rate ratio, CI: confidence interval.

\*N=2,177 students with at least one qPCR test for SARS-CoV-2 during the study period.

\*\*Not mutually exclusive; all participants not included in specified racial/ethnic category served as reference for each comparison.

### Phylogenetic analysis

We retrieved whole viral genome sequences for 35 of the 60 positive cases from this study, 29 (83%) of which were found to be part of a campus super-spreader event involving a total of 57 campus-affiliated individuals with samples sequenced by IGI (Figure 1A). Most (69%) study participants within this cluster lived at one of two residences, with likely a single participant originating the super-spreader event. The cluster of genomes was defined by three mutations (A6360G, C24502A and G110083T), two of which were extremely rare at the time of the outbreak. The combination of the three variants was only found in four genomes outside of

1  
2  
3 317 this cluster (two in the UK and two in Florida) by October 2020, making it a strong phylogenetic  
4  
5 318 signature.

6  
7 319 Phylogenetic analysis demonstrated that the cluster remained confined to campus, as  
8  
9 320 this signature was not observed in any genomes from samples in the surrounding communities  
10  
11 321 or California state in the months following the super-spreader event. When the trio of mutations  
12  
13 322 was searched in a phylogeny constructed from over 1.2 million genomes worldwide using  
14  
15 323 USHER in April 2021,[25] no descendent leaves were found in the tree under the cluster (Figure  
16  
17 324 1B), indicating that the lineage died out after the super-spreader event.

18  
19  
20 325  
21 326 *Factors associated with test positivity*

22  
23 327 At least one symptom survey was completed in the 7 days before sample collection for  
24  
25 328 88% of tests (n=6,668), including 72% of tests (n=5,465) that had symptom data from the day of  
26  
27 329 sample collection. Of the 52 cases who completed at least one survey during the week before  
28  
29 330 their positive sample was collected (mean: 4 surveys), 23 cases (44%) had reported at least  
30  
31 331 one of the nine COVID-19 symptoms that triggered a notification for them to test. Test positivity  
32  
33 332 was 12.7 times higher among participants who had a recent symptom-triggered notification  
34  
35 333 (95% CI: 7.4, 21.8) (Table 3). Notification-triggering symptoms most strongly associated with  
36  
37 334 test positivity included loss of sense of taste or smell and feeling feverish. Weakness, sweats or  
38  
39 335 chills, and swollen glands were the non-triggering symptoms most strongly associated with test  
40  
41 336 positivity.  
42  
43  
44  
45  
46  
47  
48  
49  
50  
51  
52  
53  
54  
55  
56  
57  
58  
59  
60

**Table 3.** Bivariate associations between prospectively monitored symptoms and exposures and SARS-CoV-2 qPCR test positivity among participants in the Safe Campus Initiative, June-August 2020.

|                                                                    | Test Positivity,<br>% (+ Tests / All Tests) | IRR (95% CI)      |
|--------------------------------------------------------------------|---------------------------------------------|-------------------|
| Overall*                                                           | 0.8 (60 / 7,615)                            | -                 |
| Signs/symptoms within 7 days of test                               |                                             |                   |
| No                                                                 | 0.3 (18 / 5,489)                            | Reference**       |
| Yes (any)                                                          | 2.9 (34 / 1,179)                            | 8.8 (5.0, 15.5)   |
| - Temperature $\geq 100.4^{\circ}\text{F}$ †                       | 0.0 (0 / 10)                                | 0.0 (0.0, 0.0)    |
| - Temperature $\geq 100.0^{\circ}\text{F}$                         | 10.5 (2 / 19)                               | 13.2 (3.4, 50.9)  |
| - Temperature $\geq 99.0^{\circ}\text{F}$                          | 2.9 (12 / 417)                              | 4.3 (2.2, 8.2)    |
| - Feeling feverish †                                               | 15.3 (11 / 72)                              | 24.6 (13.2, 45.8) |
| - Dry cough †                                                      | 5.6 (7 / 126)                               | 8.1 (3.7, 17.7)   |
| - Coughing up mucus †                                              | 5.5 (5 / 91)                                | 7.7 (3.1, 19.0)   |
| - Unusual chest pain or pressure †                                 | 9.7 (6 / 62)                                | 13.9 (6.1, 31.6)  |
| - Difficulty breathing †                                           | 5.6 (1 / 18)                                | 7.2 (1.0, 49.8)   |
| - Shortness of breath †                                            | 8.9 (4 / 45)                                | 12.3 (4.6, 32.9)  |
| - Trouble thinking/concentrating †                                 | 7.6 (5 / 66)                                | 10.7 (4.4, 26.1)  |
| - Loss of sense of taste †                                         | 42.9 (3 / 7)                                | 58.3 (23.7, 143)  |
| - Loss of sense of smell †                                         | 33.3 (4 / 12)                               | 46.2 (19.2, 111)  |
| - Any notification-triggering symptom †                            | 5.9 (23 / 393)                              | 12.7 (7.4, 21.8)  |
| - Loss of appetite                                                 | 10.3 (6 / 58)                               | 14.8 (6.5, 33.9)  |
| - Fatigue                                                          | 3.5 (13 / 371)                              | 5.4 (3.0, 10.6)   |
| - Trouble sleeping                                                 | 5.1 (7 / 136)                               | 7.5 (3.4, 16.4)   |
| - Headache                                                         | 4.7 (14 / 300)                              | 7.8 (4.3, 14.3)   |
| - Runny, blocked, or painful sinuses                               | 5.2 (14 / 267)                              | 8.8 (4.8, 16.2)   |
| - Sneezing                                                         | 1.9 (2 / 106)                               | 2.5 (0.6, 10.1)   |
| - Swollen, red, or painful eyes                                    | 8.6 (5 / 58)                                | 12.1 (4.9, 30.0)  |
| - Sore throat                                                      | 3.1 (8 / 258)                               | 4.5 (2.1, 9.5)    |
| - Stomach pain                                                     | 5.8 (5 / 86)                                | 8.1 (3.3, 20.1)   |
| - Diarrhea                                                         | 4.9 (4 / 82)                                | 6.7 (2.5, 18.2)   |
| - Nausea or vomiting                                               | 3.3 (3 / 90)                                | 4.5 (1.4, 14.2)   |
| - Body aches or muscle pain                                        | 8.2 (12 / 146)                              | 13.4 (7.2, 25.2)  |
| - Sweats or chills                                                 | 11.5 (10 / 87)                              | 18.0 (9.2, 35.2)  |
| - Swollen glands                                                   | 12.2 (5 / 41)                               | 17.3 (7.2, 41.2)  |
| - Weakness                                                         | 13.5 (10 / 74)                              | 21.2 (11.0, 40.9) |
| Exposures within 14 days before test                               |                                             |                   |
| No                                                                 | 0.3 (15 / 4,319)                            | Reference**       |
| Yes (any)                                                          | 3.4 (17 / 506)                              | 9.6 (4.8, 19.2)   |
| - Suspected or confirmed COVID-19 case in household †              | 7.4 (7 / 95)                                | 13.9 (6.1, 31.8)  |
| - Close contact with suspected or confirmed case outside household | 3.5 (5 / 144)                               | 6.0 (2.3, 15.4)   |
| - Household member with new COVID-19-like symptoms †               | 4.4 (5 / 114)                               | 7.6 (3.0, 19.6)   |
| - Household member with any new symptoms of illness                | 2.6 (9 / 347)                               | 5.0 (2.3, 10.8)   |

|                                          |                  |                   |
|------------------------------------------|------------------|-------------------|
| - Any notification-triggering exposure † | 5.1 (9 / 177)    | 10.3 (4.8, 22.09) |
| Activities within 14 days before test    |                  |                   |
| No                                       | 0.4 (3 / 678)    | Reference**       |
| Yes (any)                                | 0.7 (29 / 4,145) | 1.6 (0.5, 5.1)    |
| - Spent time at another residence        | 1.1 (26 / 2,327) | 4.6 (1.9, 11.3)   |
| - Had visitors at own residence          | 1.0 (22 / 2,205) | 2.6 (1.2, 5.5)    |
| - Attended gathering >10 people          | 2.8 (19 / 672)   | 9.0 (4.5, 18.1)   |
| - Worked outside of home                 | 0.5 (10 / 2,152) | 0.6 (0.3, 1.2)    |
| - Used public restroom                   | 0.7 (12 / 1,821) | 1.0 (0.5, 2.0)    |
| - Used public transportation             | 0.6 (4 / 699)    | 0.8 (0.3, 2.4)    |
| - Participated in group sports           | 1.6 (4 / 257)    | 2.5 (0.9, 7.2)    |

qPCR: quantitative polymerase chain reaction, IRR: incidence rate ratio, CI: confidence interval.

\*Excluding resamples, same-day re-tests, and repeated positives; includes N=2,914 participants with at least one qPCR test for SARS-CoV-2 during the study period.

\*\*Reference group for "Yes (any)" comparisons; reference groups for specific symptoms/exposures/activities were those who did not report that symptom/exposure/activity.

† Reporting triggered notification to test.

Participants completed at least one weekly exposure survey in the 14 days before sample collection for 63% of tests (n=4,825). Of the 32 cases who had recently completed an exposure survey at the time of sample collection, 9 (29%) reported a potential household exposure that triggered a notification for them to test (Table 3). Test positivity was 10.3 times higher among participants who had a recent exposure-triggered notification (95% CI: 4.8, 22.0). Test positivity was also significantly higher among participants who reported recent engagement in 'higher risk' social activities, most notably attending a gathering of more than 10 people (IRR: 9.0; 95% CI: 4.5, 18.1).

### SARS-CoV-2 seroprevalence

Only 18 (0.6%) of 2,877 participants who provided blood samples at baseline had SARS-CoV-2 antibodies (Table 4), all but one of them students. Most participants with antibodies at baseline either suspected past infection (28%), had been previously diagnosed (22%), or had a positive qPCR test the day blood was drawn (11%). Most (85%) participants in the student and essential worker cohorts provided blood samples at both baseline and endline (mean interval between samples: 48 days). Among 2,076 participants with baseline and endline

363 blood samples, 33 (1.6%) seroconverted from non-reactive at baseline to reactive at endline, 30  
 364 of whom (91%) were also diagnosed via qPCR test during the study. Of the three participants  
 365 who seroconverted without a positive qPCR test, two self-reported suspected past infection (one  
 366 before baseline, one during the study period), while the third did not suspect past infection and  
 367 had four negative qPCR tests over 40 days of study participation.

368 Of the 60 participants with incident SARS-CoV-2 infection during the study period, 41  
 369 (68%) provided an endline blood sample at least one week after the date of their first positive  
 370 qPCR test (mean time between positive qPCR test and blood sample: 36 days; range 13-52  
 371 days). Of these, 34 (83%) were reactive (Table 4).

372

373 **Table 4.** Seroprevalence of SARS-CoV-2 antibodies among participants in the Safe Campus  
 374 Initiative, June-August 2020.

|                                             | Baseline, N (%) | Endline, N (%) | Both, N (%)  |
|---------------------------------------------|-----------------|----------------|--------------|
| <b>Serostatus – Cross-sectional*</b>        |                 |                |              |
| Reactive                                    | 18 (0.6)        | 48 (2.3)       | -            |
| Non-reactive                                | 2,859 (99.4)    | 2,039 (97.7)   | -            |
| <b>Serostatus – Longitudinal**</b>          |                 |                |              |
| Non-Reactive → Non-Reactive                 | -               | -              | 2,029 (97.7) |
| Non-Reactive → Reactive                     | -               | -              | 33 (1.6)     |
| Reactive → Non-Reactive                     | -               | -              | 0 (0)        |
| Reactive → Reactive                         | -               | -              | 14 (0.7)     |
| <b>Serostatus – Previous qPCR Positive†</b> |                 |                |              |
| Reactive                                    | -               | 34 (82.9)      | -            |
| Non-reactive                                | -               | 7 (17.1)       | -            |

375 qPCR: quantitative polymerase chain reaction.

376 \*N=2,888 participants who provided at least one blood sample.

377 \*\*N=2,076 participants who provided blood samples at baseline and endline.

378 †N=41 participants who provided an endline blood sample ≥7 days *after* infection with SARS-CoV-2 identified via  
 379 positive qPCR test.

380

## 381 Discussion

382 This study provides a model of a voluntary, incentivized system to identify and link at-risk  
 383 students to SARS-CoV-2 testing. While the incidence and seroprevalence of SARS-CoV-2 were

1  
2  
3 384 generally low in this cohort of university students and employees in the summer of 2020, we  
4  
5 385 observed the highest incidence among undergraduate students living in congregate settings,  
6  
7 386 with nearly half of cases found to be associated with a super-spreader event.  
8

9 387 At the time of the study, many infection control strategies centered on symptomatic  
10  
11 388 testing, reducing the likelihood of identifying asymptomatic, mildly symptomatic, and pre-  
12  
13 389 symptomatic infections. Our approach sought to integrate symptom-based monitoring with  
14  
15 390 exposure monitoring, random surveillance testing, and targeted surveillance testing in the  
16  
17 391 context of an outbreak. Within this cohort, we previously demonstrated the acceptability of our  
18  
19 392 low-barrier SARS-CoV-2 mitigation approach and the limitations of temperature monitoring as a  
20  
21 393 tool for case identification.[14,28] The present analysis builds upon these contributions by  
22  
23 394 triangulating prospective qPCR testing data with phylogenetic analyses of positive samples and  
24  
25 395 serial antibody testing to evaluate whether case identification and containment were achieved.  
26  
27 396 In doing so, we found evidence that the system successfully identified a high proportion of  
28  
29 397 incident SARS-CoV-2 cases among participants and may have mitigated community  
30  
31 398 transmission after an outbreak. Specifically, 91% of participants with newly-identified antibodies  
32  
33 399 for SARS-CoV-2 at the end of the study had also been diagnosed with incident infection via  
34  
35 400 qPCR test during the study period. While a sizeable cluster of cases among participants was  
36  
37 401 traced to a single super-spreader event, the associated cluster lineage was successfully  
38  
39 402 contained without spreading beyond campus. As the outbreak unfolded, the system also  
40  
41 403 allowed for rapid real-time response (i.e., surveillance testing notifications to students living in  
42  
43 404 congregate housing) and offered a readily accessible, incentivized entry point for testing for  
44  
45 405 students concerned about potential exposure.  
46  
47  
48

49 406 Although some universities have adopted punitive measures intended to prevent  
50  
51 407 transmission by controlling student behavior (for example, suspending students for hosting  
52  
53 408 gatherings),[31–33] this approach has been criticized for its potential to reduce students' trust  
54  
55 409 and cooperation.[34–36] Instead of punishing or shaming students who fail to adhere to public  
56  
57  
58  
59  
60

1  
2  
3 410 health guidance, some epidemiologists have called for a harm-reduction approach which  
4  
5 411 supports and engages students as part of the solution.[34–36] The present study reinforces the  
6  
7 412 potential to integrate voluntary testing and risk monitoring systems to support targeted case  
8  
9 413 identification, as evidenced by the significantly higher positivity rates found among participants  
10  
11 414 whose self-reported symptoms and exposures triggered notifications to test. Our findings also  
12  
13 415 support increased outreach to groups of students at highest risk, particularly younger students  
14  
15 416 in congregate housing.

17  
18 417 This study is strengthened by rich longitudinal data, including symptom and exposure  
19  
20 418 tracking, qPCR testing, and seroprevalence data from more than 2,000 participants. The study  
21  
22 419 population comprised of a broad sample of university affiliates, both students and employees,  
23  
24 420 with strong representation of university subpopulations perceived to be at higher risk of infection  
25  
26 421 (e.g., undergraduates, essential healthcare workers). As on-campus activities were severely  
27  
28 422 restricted throughout the study period (all classes were held online, and few students were living  
29  
30 423 in residence halls), this study cannot provide insight into SARS-CoV-2 transmission risks related  
31  
32 424 to on-campus student activities. Nevertheless, as 73% of UC Berkeley undergraduate students  
33  
34 425 lived off campus *before* the pandemic,[37] systems to detect off-campus (i.e., community and  
35  
36 426 household) transmission remain important for SARS-CoV-2 monitoring efforts among students.  
37  
38 427 Additionally, all participants in the essential workers cohort and a subset of participants in the  
39  
40 428 faculty/cohort were working on campus during the study period, further motivating efforts to  
41  
42 429 monitor incidence in this population.

43  
44  
45 430 There remain several limitations. We observed relatively few SARS-CoV-2 cases during  
46  
47 431 the study period. Accordingly, although many associations are statistically significant, our  
48  
49 432 estimates are imprecise (i.e., have wide confidence intervals) and must be interpreted with  
50  
51 433 caution. This study took place before the development of highly transmissible variants, such as  
52  
53 434 Delta and Omicron, and before vaccine rollout. Observed associations between symptoms and  
54  
55 435 positivity may also differ among those who have been infected by more recent variants and/or



1  
2  
3 436 vaccinated. Further research is necessary to adapt and evaluate similar systems in the context  
4  
5 437 of both heightened transmissibility and more prevalent natural and vaccine-induced immunity.  
6  
7 438 Additionally, a high proportion of identified cases were traced to one outbreak, limiting the  
8  
9 439 generalizability of our exploratory assessment of risk factors for incident infection. There was  
10  
11 440 also anecdotal evidence that the outbreak prompted exposed students to enroll as study  
12  
13 441 participants.[14] While this self-referral into the study is likely to increase selection bias, it also  
14  
15 442 illustrates the utility of implementing non-stigmatizing, incentivized testing approaches to  
16  
17 443 increase testing uptake among at-risk students. Finally, our identification of participants who  
18  
19 444 seroconverted between baseline and endline may be incomplete due to loss-to-follow up and  
20  
21 445 imperfect sensitivity of SARS-CoV-2 antibody testing.

24 446 By integrating symptom and exposure monitoring systems with low-barrier testing, we  
25  
26 447 identified incident SARS-CoV-2 infections to reduce transmission within a university setting. Our  
27  
28 448 study contributes to a growing body of literature on novel, integrated SARS-CoV-2 surveillance  
29  
30 449 strategies in university settings.[38–44] While there have been seismic shifts in the SARS-CoV-  
31  
32 450 2 pandemic since 2020, universities continue to grapple with how best to mitigate on-campus  
33  
34 451 spread in the face of emerging variants, incomplete vaccination coverage, breakthrough  
35  
36 452 infections, and decreased reliance on other mitigation strategies (e.g., masking, remote  
37  
38 453 learning).[45,46] In light of universities' resource constraints and persistently high case counts,  
39  
40 454 incentivized approaches may not be feasible or sustainable in many settings. Thus, further  
41  
42 455 research is needed to identify and test non-monetary incentives and other behavioral nudge  
43  
44 456 strategies that encourage students and other campus community members to actively  
45  
46 457 participate in public health efforts to combat the pandemic. The lessons learned through this  
47  
48 458 study may inform the design of future adaptive strategies, ideally building beyond  
49  
50 459 symptom/exposure monitoring and qPCR testing to integrate complementary interventions such  
51  
52 460 as rapid antigen self-testing and vaccination promotion.  
53  
54  
55  
56  
57  
58  
59  
60

1  
2  
3 461 **Keywords:** COVID-19, SARS-CoV-2, United States, young adults, students, universities,  
4  
5 462 essential workers, seroprevalence  
6

7 463  
8 464 **Acknowledgements**  
9

10 465 We are grateful for the contributions of an exceptional team of graduate student  
11  
12 466 researchers (Mariah De Zuzuarregui, Darren Frank, Sarah Gomez-Aladino, Ariel Muñoz, Ruben  
13  
14 467 Prado, Lawrence Tello, Emily Wang, and Sabrina Williamson) and our collaborators at UC  
15  
16 468 Berkeley's University Health Services (including but not limited to: Judith Sansone, Melody  
17  
18 469 Heller, Holly Stern, Tyler Crooks, Desi Gallardo, Jeff Kreutzen, Rebecca Stephenson, Lisa  
19  
20 470 Polley, and Melissa Hennings), the Innovative Genomics Institute (including but not limited to:  
21  
22 471 Fyodor Urnov, Shana McDevitt, Ariana Hirsch, Alexander Ehrenberg, and the other members of  
23  
24 472 the IGI SARS-CoV-2 testing consortium: M Amen, Kerrie W Barry, John M Boyle, Cara E Brook,  
25  
26 473 Seunga Choo, L T Cornmesser, David J Dilworth, Jennifer A Doudna, Indro Fedrigo, Skyler E  
27  
28 474 Friedline, Thomas G W Graham, Ralph Green, Jennifer R Hamilton, Megan L Hochstrasser,  
29  
30 475 Dirk Hockemeyer, Netravathi Krishnappa, Azra Lari, Hanqin Li, Enrique Lin-Shiao, Tianlin Lu,  
31  
32 476 Elijah F Lyons, Kevin G Mark, Lisa Argento Martell, A Raquel O Martins, Patrick S Mitchell,  
33  
34 477 Erica A Moehle, Christine Naca, Divya Nandakumar, Elizabeth O'Brien, Derek J Pappas,  
35  
36 478 Kathleen Pestal, Diana L Quach, Benjamin E Rubin, Rohan Sachdeva, Elizabeth C Stahl,  
37  
38 479 Abdullah Muhammad Syed, I-Li Tan, Amy L Tollner, Connor A Tsuchida, C Kimberly Tsui,  
39  
40 480 Timothy K Turkalo, M Bryan Warf, Oscar N Whitney, and Lea B Witkowsky), and Vitalant  
41  
42 481 Research Institute (including but not limited to: Mars Stone, Chloe Thorbrogger, Alice Lee, and  
43  
44 482 Heather Tanner). The author would also like to thank Drs. Sandra McCoy, Stefano Bertozzi, and  
45  
46 483 Lauren Ralph for their feedback on this manuscript.  
47  
48  
49  
50

51 484 **Contributors:** LH performed statistical analyses and wrote the first draft of the manuscript. SW  
52  
53 485 performed phylogenomic analyses and prepared associated figures and paragraphs. AR and  
54  
55 486 MP designed the study and provided input on the manuscript. LP, SF, AH, GN, the IGI SARS-

1  
2  
3 487 CoV-2 Testing Consortium, CDG, and MB provided feedback on the study design and  
4  
5 488 manuscript. YL assisted with data analyses. All authors hold final responsibility for the decision  
6  
7 489 to submit for publication.  
8  
9

10 490 **Declaration of interests:** Vitalant Research Institute, of which Dr. Michael Busch is Director,  
11  
12 491 receives research funding and free assay kits from Ortho Clinical Diagnostics. Dr. Busch does  
13  
14 492 not receive salary support or personal compensation from Ortho Clinical Diagnostics. The  
15  
16 493 remaining authors declare no competing interests.  
17  
18

19 494 **Funding:** The study was funded by private donors who had no role in study design, data  
20  
21 495 collection, data analysis, data interpretation, or writing of the report.  
22  
23

24 496 **Data sharing:** De-identified data sets used in analyses and accompanying R Markdown script  
25  
26 497 files will be publicly available at the time of publication at the following link:  
27  
28 498 <https://github.com/lauren-hunter/bcsci>  
29  
30

31 499 **Ethical approvals:** All study activities were approved by the University of California, Berkeley  
32  
33 500 Committee for the Protection of Human Subjects (#2020-06-13349, #2020-05-13261, #2020-04-  
34  
35 501 13238).  
36  
37  
38  
39  
40  
41  
42  
43  
44  
45  
46  
47  
48  
49  
50  
51  
52  
53  
54  
55  
56  
57  
58  
59  
60

502

## References

- 1 The New York Times. Tracking the Coronavirus at U.S. Colleges and Universities. The New York Times. 2020.<https://www.nytimes.com/interactive/2020/us/covid-college-cases-tracker.html> (accessed 15 Dec 2020).
- 2 Boehmer TK, DeVies J, Caruso E, *et al.* Changing Age Distribution of the COVID-19 Pandemic - United States, May-August 2020. *MMWR Morb Mortal Wkly Rep* 2020;**69**:1404–9. doi:10.15585/mmwr.mm6939e1
- 3 Salvatore PP. Recent Increase in COVID-19 Cases Reported Among Adults Aged 18–22 Years — United States, May 31–September 5, 2020. *MMWR Morb Mortal Wkly Rep* 2020;**69**. doi:10.15585/mmwr.mm6939e4
- 4 Rossen LM, Branum AM, Ahmad FB, *et al.* Excess Deaths Associated with COVID-19, by Age and Race and Ethnicity — United States, January 26–October 3, 2020. *MMWR Morb Mortal Wkly Rep* 2020;**69**:1522–7. doi:10.15585/mmwr.mm6942e2
- 5 Moghadas SM, Fitzpatrick MC, Sah P, *et al.* The implications of silent transmission for the control of COVID-19 outbreaks. *PNAS* 2020;**117**:17513–5. doi:10.1073/pnas.2008373117
- 6 Ivory D, Gebeloff R, Mervosh S. Young People Have Less Covid-19 Risk, but in College Towns, Deaths Rose Fast. The New York Times. 2020.<https://www.nytimes.com/2020/12/12/us/covid-colleges-nursing-homes.html> (accessed 15 Dec 2020).
- 7 Andersen MS, Bento AI, Basu A, *et al.* College Openings, Mobility, and the Incidence of COVID-19 Cases. *medRxiv* 2020;:2020.09.22.20196048. doi:10.1101/2020.09.22.20196048
- 8 Leidner AJ. Opening of Large Institutions of Higher Education and County-Level COVID-19 Incidence — United States, July 6–September 17, 2020. *MMWR Morb Mortal Wkly Rep* 2021;**70**. doi:10.15585/mmwr.mm7001a4
- 9 Ferdinands JM. Waning 2-Dose and 3-Dose Effectiveness of mRNA Vaccines Against COVID-19–Associated Emergency Department and Urgent Care Encounters and Hospitalizations Among Adults During Periods of Delta and Omicron Variant Predominance — VISION Network, 10 States, August 2021–January 2022. *MMWR Morb Mortal Wkly Rep* 2022;**71**. doi:10.15585/mmwr.mm7107e2
- 10 Yasmin F, Najeeb H, Moeed A, *et al.* COVID-19 Vaccine Hesitancy in the United States: A Systematic Review. *Front Public Health* 2021;**9**:770985. doi:10.3389/fpubh.2021.770985
- 11 Boeshaghi AS, Tan FH, Renton B, *et al.* Markedly heterogeneous COVID-19 testing plans among US colleges and universities. *medRxiv* 2020;:2020.08.09.20171223. doi:10.1101/2020.08.09.20171223
- 12 Nadworny E, McMinn S. Even In COVID-19 Hot Spots, Many Colleges Aren't Aggressively Testing Students. NPR.org. 2020.<https://www.npr.org/2020/10/06/919159473/even-in-covid-hot-spots-many-colleges-arent-aggressively-testing-students> (accessed 7 Jan 2021).

- 1  
2  
3 539 13 Schultes O, Clarke V, Paltiel AD, *et al.* COVID-19 Testing and Case Rates and Social  
4 540 Contact Among Residential College Students in Connecticut During the 2020-2021  
5 541 Academic Year. *JAMA Network Open* 2021;**4**:e2140602.  
6 542 doi:10.1001/jamanetworkopen.2021.40602  
7
- 8 543 14 Packel L, Reingold A, Hunter L, *et al.* Piloting an integrated SARS-CoV-2 testing and data  
9 544 system for outbreak containment among college students: A prospective cohort study.  
10 545 *PLOS ONE* 2021;**16**:e0245765. doi:10.1371/journal.pone.0245765  
11
- 12 546 15 von Elm E, Altman DG, Egger M, *et al.* The Strengthening the Reporting of Observational  
13 547 Studies in Epidemiology (STROBE) statement: guidelines for reporting observational  
14 548 studies. *Epidemiology* 2007;**18**:800–4. doi:10.1097/EDE.0b013e3181577654  
15
- 16 549 16 Health Officer Order Documents. City of Berkeley. 2020.[https://berkeleyca.gov/safety-](https://berkeleyca.gov/safety-health/covid-19/covid-19-restrictions/health-officer-order-documents)  
17 550 [health/covid-19/covid-19-restrictions/health-officer-order-documents](https://berkeleyca.gov/safety-health/covid-19/covid-19-restrictions/health-officer-order-documents) (accessed 5 Feb 2023).  
18
- 19 551 17 COVID 19 Daily Cases and Deaths. Alco Data Portal.  
20 552 2023.[https://data.acgov.org/datasets/f6cabaab66ea43a585bfd83e0a3bcc63\\_0/](https://data.acgov.org/datasets/f6cabaab66ea43a585bfd83e0a3bcc63_0/) (accessed 5  
21 553 Feb 2023).  
22
- 23 554 18 Harris PA, Taylor R, Thielke R, *et al.* Research electronic data capture (REDCap)—A  
24 555 metadata-driven methodology and workflow process for providing translational research  
25 556 informatics support. *Journal of Biomedical Informatics* 2009;**42**:377–81.  
26 557 doi:10.1016/j.jbi.2008.08.010  
27
- 28 558 19 Harris PA, Taylor R, Minor BL, *et al.* The REDCap consortium: Building an international  
29 559 community of software platform partners. *Journal of Biomedical Informatics*  
30 560 2019;**95**:103208. doi:10.1016/j.jbi.2019.103208  
31
- 32 561 20 Amen AM, Barry KW, Boyle JM, *et al.* Blueprint for a pop-up SARS-CoV-2 testing lab.  
33 562 *Nature Biotechnology* 2020;**38**:791–7. doi:10.1038/s41587-020-0583-3  
34
- 35 563 21 Gohl DM, Garbe J, Grady P, *et al.* A rapid, cost-effective tailed amplicon method for  
36 564 sequencing SARS-CoV-2. *BMC Genomics* 2020;**21**:863. doi:10.1186/s12864-020-07283-6  
37
- 38 565 22 Bushnell B. BBMap. <https://sourceforge.net/projects/bbmap>  
39
- 40 566 23 Hadfield J, Megill C, Bell SM, *et al.* Nextstrain: real-time tracking of pathogen evolution.  
41 567 *Bioinformatics* 2018;**34**:4121–3. doi:10.1093/bioinformatics/bty407  
42
- 43 568 24 Shu Y, McCauley J. GISAID: Global initiative on sharing all influenza data – from vision to  
44 569 reality. *Euro Surveill* 2017;**22**:30494. doi:10.2807/1560-7917.ES.2017.22.13.30494  
45
- 46 570 25 Turakhia Y, Thornlow B, Hinrichs AS, *et al.* Ultrafast Sample Placement on Existing Trees  
47 571 (USHER) Empowers Real-Time Phylogenetics for the SARS-CoV-2 Pandemic.  
48 572 2020;:2020.09.26.314971. doi:10.1101/2020.09.26.314971  
49
- 50 573 26 Ortho Clinical Diagnostics. INSTRUCTIONS FOR USE: VITROS Immunodiagnostic  
51 574 Products Anti-SARS-CoV-2 Total Reagent Pack, VITROS Immunodiagnostic Products Anti-  
52 575 SARS-CoV-2 Total Calibrator. 2020.<https://www.fda.gov/media/136967/download> (accessed  
53 576 7 Jan 2021).  
54
- 55  
56  
57  
58  
59

- 1  
2  
3 577 27 Mantzari E, Vogt F, Shemilt I, *et al.* Personal financial incentives for changing habitual  
4 578 health-related behaviors: A systematic review and meta-analysis. *Prev Med* 2015;**75**:75–85.  
5 579 doi:10.1016/j.ypmed.2015.03.001  
6  
7 580 28 Facente SN, Hunter LA, Packel LJ, *et al.* Feasibility and effectiveness of daily temperature  
8 581 screening to detect COVID-19 in a prospective cohort at a large public university. *BMC*  
9 582 *Public Health* 2021;**21**:1693. doi:10.1186/s12889-021-11697-6  
10  
11 583 29 Liang K-Y, Zeger SL. Longitudinal Data Analysis Using Generalized Linear Models.  
12 584 *Biometrika* 1986;**73**:13–22. doi:10.2307/2336267  
13  
14 585 30 R Core Team. R: A language and environment for statistical computing.  
15 586 2021.<https://www.R-project.org/>  
16  
17 587 31 Gross EL. Ohio State University Suspends 228 Students For Violating Covid-19 Guidelines.  
18 588 Forbes. 2020.[https://www.forbes.com/sites/elanagross/2020/08/24/ohio-state-university-](https://www.forbes.com/sites/elanagross/2020/08/24/ohio-state-university-suspends-228-students-for-violating-covid-19-guidelines/)  
19 589 [suspends-228-students-for-violating-covid-19-guidelines/](https://www.forbes.com/sites/elanagross/2020/08/24/ohio-state-university-suspends-228-students-for-violating-covid-19-guidelines/) (accessed 9 Sep 2020).  
20  
21  
22 590 32 Giuliani-Hoffman F. Tulane students warned of suspension or expulsion for partying in  
23 591 groups larger than 15. CNN. 2020.[https://www.cnn.com/2020/07/09/us/tulane-students-](https://www.cnn.com/2020/07/09/us/tulane-students-group-gathering-coronavirus-trnd/index.html)  
24 592 [group-gathering-coronavirus-trnd/index.html](https://www.cnn.com/2020/07/09/us/tulane-students-group-gathering-coronavirus-trnd/index.html) (accessed 9 Sep 2020).  
25  
26 593 33 Treisman R. More Than 200 Ohio State University Students Suspended For Violating  
27 594 Pandemic Rules. NPR.org. 2020.[https://www.npr.org/sections/coronavirus-live-](https://www.npr.org/sections/coronavirus-live-updates/2020/08/25/906039378/more-than-200-ohio-state-university-students-suspended-for-violating-pandemic-ru)  
28 595 [updates/2020/08/25/906039378/more-than-200-ohio-state-university-students-suspended-](https://www.npr.org/sections/coronavirus-live-updates/2020/08/25/906039378/more-than-200-ohio-state-university-students-suspended-for-violating-pandemic-ru)  
29 596 [for-violating-pandemic-ru](https://www.npr.org/sections/coronavirus-live-updates/2020/08/25/906039378/more-than-200-ohio-state-university-students-suspended-for-violating-pandemic-ru) (accessed 9 Sep 2020).  
30  
31 597 34 Gold JM Jessica. Colleges Are Getting Ready to Blame Their Students. The Atlantic.  
32 598 2020.[https://www.theatlantic.com/ideas/archive/2020/07/colleges-are-getting-ready-blame-](https://www.theatlantic.com/ideas/archive/2020/07/colleges-are-getting-ready-blame-their-students/614410/)  
33 599 [their-students/614410/](https://www.theatlantic.com/ideas/archive/2020/07/colleges-are-getting-ready-blame-their-students/614410/) (accessed 8 Sep 2020).  
34  
35 600 35 Marcus J. Quarantine Fatigue Is Real. The Atlantic.  
36 601 2020.[https://www.theatlantic.com/ideas/archive/2020/05/quarantine-fatigue-real-and-](https://www.theatlantic.com/ideas/archive/2020/05/quarantine-fatigue-real-and-shaming-people-wont-help/611482/)  
37 602 [shaming-people-wont-help/611482/](https://www.theatlantic.com/ideas/archive/2020/05/quarantine-fatigue-real-and-shaming-people-wont-help/611482/) (accessed 8 Sep 2020).  
38  
39 603 36 Marcus J, Baral S. University leaders should take a more humane approach to students  
40 604 during COVID-19 (opinion) | Inside Higher Ed. Inside Higher Ed.  
41 605 2020.[https://www.insidehighered.com/views/2020/10/15/university-leaders-should-take-](https://www.insidehighered.com/views/2020/10/15/university-leaders-should-take-more-humane-approach-students-during-covid-19)  
42 606 [more-humane-approach-students-during-covid-19](https://www.insidehighered.com/views/2020/10/15/university-leaders-should-take-more-humane-approach-students-during-covid-19) (accessed 8 Jan 2021).  
43  
44 607 37 UC Berkeley Office of Undergraduate Admissions. Housing | UC Berkeley | University of  
45 608 California, Berkeley. Berkeley.edu. <https://admissions.berkeley.edu/housing> (accessed 11  
46 609 Jan 2021).  
47  
48 610 38 Petros BA, Paull JS, Tomkins-Tinch CH, *et al.* Multimodal surveillance of SARS-CoV-2 at a  
49 611 university enables development of a robust outbreak response framework. *Med* 2022;**3**:883-  
50 612 900.e13. doi:10.1016/j.medj.2022.09.003  
51  
52 613 39 Karthikeyan S, Nguyen A, McDonald D, *et al.* Rapid, Large-Scale Wastewater Surveillance  
53 614 and Automated Reporting System Enable Early Detection of Nearly 85% of COVID-19  
54  
55  
56  
57  
58  
59  
60

- 1  
2  
3 615 Cases on a University Campus. *mSystems* 2021;**6**:e0079321.  
4 616 doi:10.1128/mSystems.00793-21  
5  
6 617 40 Currie DW, Moreno GK, Delahoy MJ, *et al.* Interventions to Disrupt Coronavirus Disease  
7 618 Transmission at a University, Wisconsin, USA, August–October 2020. *Emerg Infect Dis*  
8 619 2021;**27**:2776–85. doi:10.3201/eid2711.211306  
9  
10 620 41 Pollock BH, Kilpatrick AM, Eisenman DP, *et al.* Safe reopening of college campuses during  
11 621 COVID-19: The University of California experience in Fall 2020. *PLOS ONE*  
12 622 2021;**16**:e0258738. doi:10.1371/journal.pone.0258738  
13  
14 623 42 Towers SA, Gemechu NB, Nagaraj NC, *et al.* SARS-CoV-2 surveillance and outbreak  
15 624 response on an urban American college campus. *J Am Coll Health* 2022;:1–9.  
16 625 doi:10.1080/07448481.2022.2034834  
17  
18 626 43 McDonnell KA, Vyas A, Castel A, *et al.* Keeping it close: The role of a Campus COVID  
19 627 Support Team (CCST) in sustaining a safe and healthy university campus during COVID-19.  
20 628 2022;:2022.05.01.22274540. doi:10.1101/2022.05.01.22274540  
21  
22 629 44 Meredith GR, Diel DG, Frazier PI, *et al.* Routine Surveillance and Vaccination on a  
23 630 University Campus During the Spread of the SARS-CoV-2 Omicron Variant. *JAMA Network*  
24 631 *Open* 2022;**5**:e2212906. doi:10.1001/jamanetworkopen.2022.12906  
25  
26 632 45 Colleges Let Students Go Unmasked Even With Covid Bearing Down. Bloomberg.com.  
27 633 2021.https://www.bloomberg.com/news/articles/2021-11-23/colleges-drop-indoor-mask-  
28 634 rules-despite-holiday-covid-threat (accessed 14 Feb 2022).  
29  
30 635 46 Saul S, Hartocollis A. Some Colleges Loosen Rules for a Virus That Won't Go Away. The  
31 636 New York Times. 2022.https://www.nytimes.com/2022/01/16/us/politics/colleges-covid-  
32 637 coronavirus.html (accessed 14 Feb 2022).  
33  
34  
35  
36  
37  
38  
39  
40  
41  
42  
43  
44  
45  
46  
47  
48  
49  
50  
51  
52  
53  
54  
55  
56  
57  
58  
59  
60

**Figure 1.** Phylogeny of outbreak-associated strain of SARS-CoV-2 among participants in the Safe Campus Initiative.

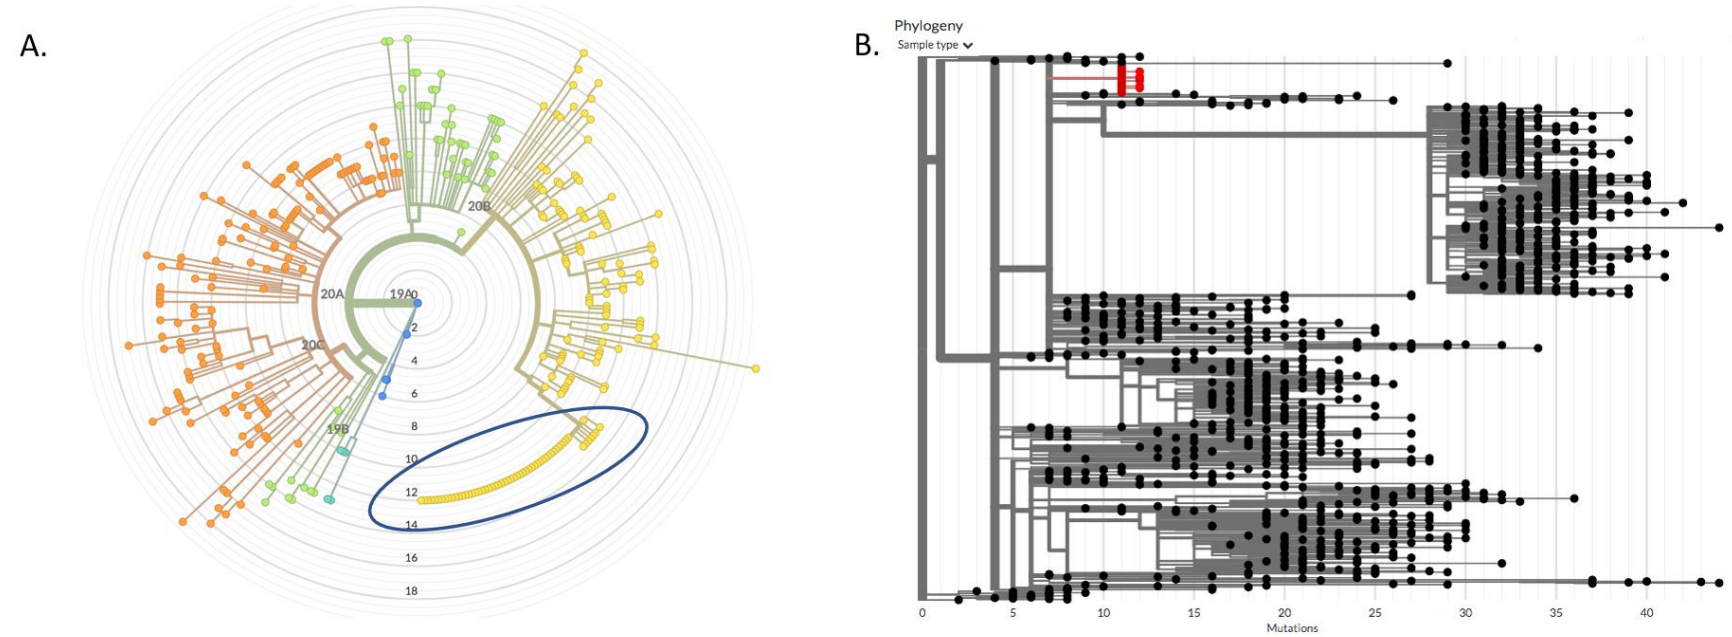

**A.** A maximum likelihood phylogeny constructed from 357 genomes sequenced by the Innovative Genomics Institute between May and July 2020 constructed using Nextstrain. Branch lengths represent divergence from Wuhan reference genome at center. Blue circle marks cluster of identical genomes from a campus super-spreader event.

**B.** A 1,057 node subtree of a neighbor-joining tree constructed with all SARS-CoV-2 sequences to date (constructed using UShER with over 1 million genomes in April 2021), showing the most similar genomes to the super-spreader event cluster (in red). There are no descendant branches from the cluster, demonstrating that the outbreak was contained and the lineage died out.



**Supplementary Table 1.** Eligibility criteria across the Berkeley COVID-19 Safe Campus Study cohorts.

|                             | <b>Student Cohort</b>                                                                                                                      | <b>Essential Worker Cohort</b>                                                                                                                                                                                                                                                                                                                                                    | <b>Faculty/Staff Cohort</b>                                                                                                                                  |
|-----------------------------|--------------------------------------------------------------------------------------------------------------------------------------------|-----------------------------------------------------------------------------------------------------------------------------------------------------------------------------------------------------------------------------------------------------------------------------------------------------------------------------------------------------------------------------------|--------------------------------------------------------------------------------------------------------------------------------------------------------------|
| <b>Eligibility Criteria</b> | - At least 18 years of age                                                                                                                 | - At least 18 years of age                                                                                                                                                                                                                                                                                                                                                        | - At least 18 years of age                                                                                                                                   |
|                             | - Currently enrolled as an undergraduate or graduate student at UC Berkeley (i.e., not graduated in Spring 2020 or incoming for Fall 2020) | - Currently employed in one of the following departments at UC Berkeley: health services, police, facility services or other building management, environmental health and safety, laboratory animal care, athletics, dining, childcare, other residential or student services<br><br>- Currently working on campus at UC Berkeley or expected to return to work during June 2020 | - Currently employed as a faculty member, staff member, or postdoctoral scholar at UC Berkeley<br><br>- Not already enrolled in the essential workers cohort |
|                             | - Primarily residing in Alameda County or Contra Costa Country between 6/1/20-8/31/20                                                      | N/A                                                                                                                                                                                                                                                                                                                                                                               | - Primarily residing in Alameda County or Contra Costa Country between 6/1/20-8/31/20                                                                        |
|                             | - Willing to sign release of information for COVID-19-related medical records                                                              | - Willing to sign release of information for COVID-19-related medical records                                                                                                                                                                                                                                                                                                     | - Willing to sign release of information for COVID-19-related medical records                                                                                |

Supplementary Figure 1. Flow diagram for the Berkeley COVID-19 Safe Campus Study cohorts.

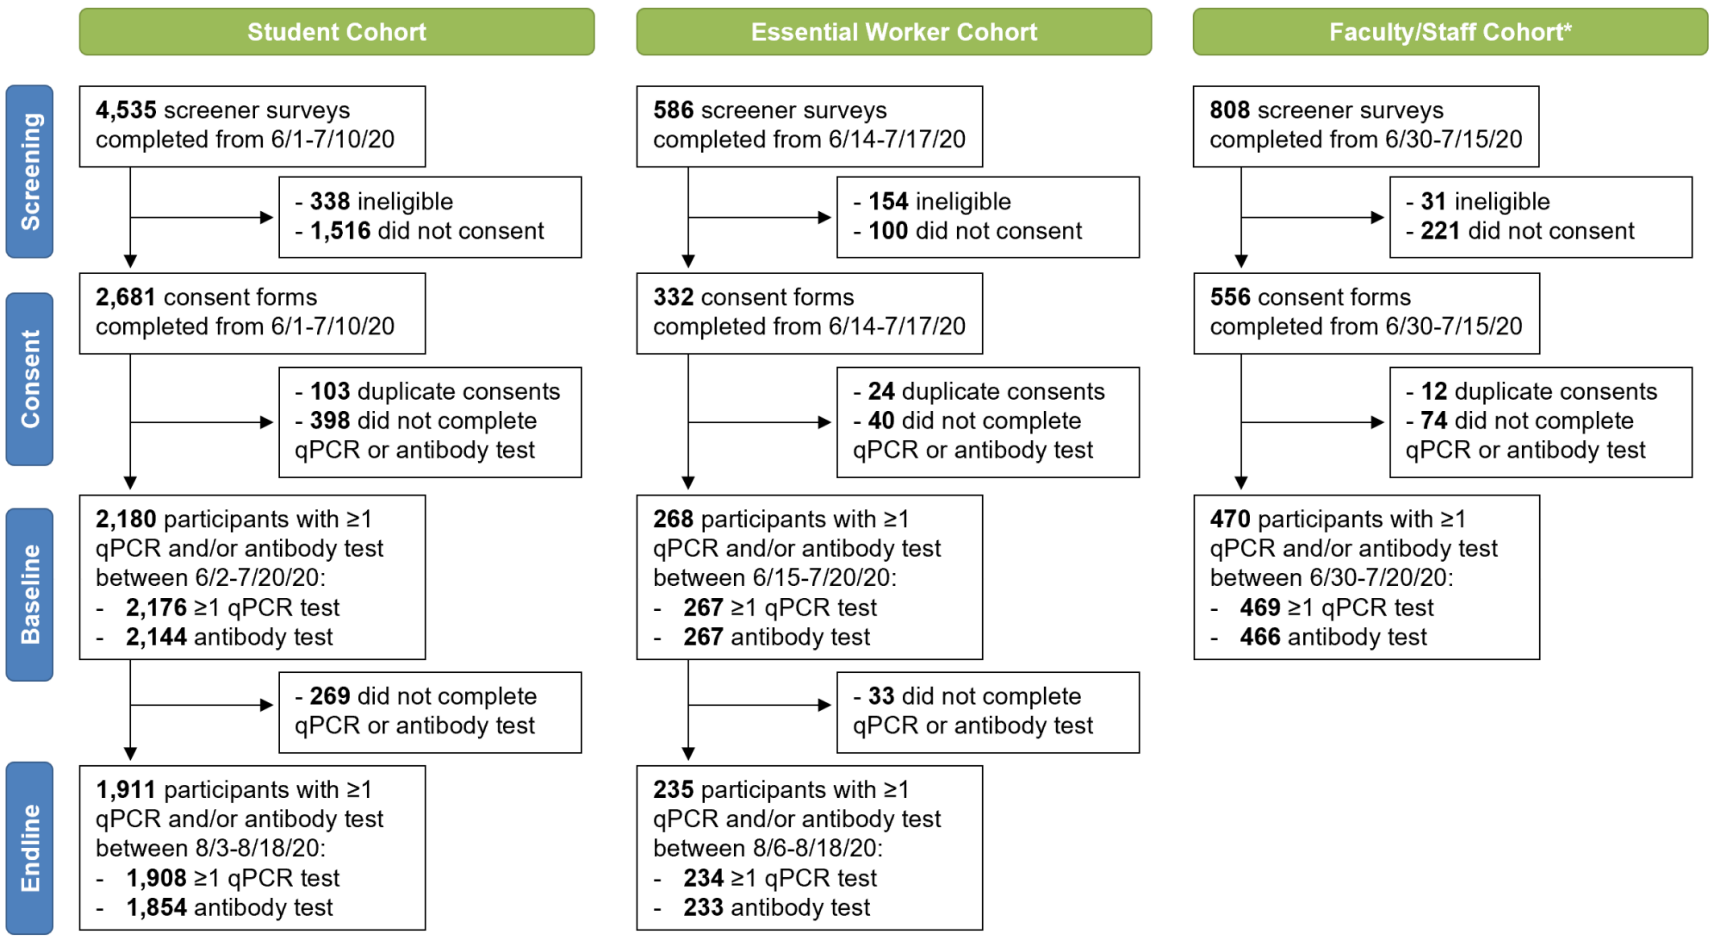

qPCR: quantitative polymerase chain reaction.

\*Faculty/staff cohort not invited for endline testing appointments but could complete follow-up qPCR tests through 8/18/20.

**Supplementary Figure 2.** qPCR testing over time across the Berkeley COVID-19 Safe Campus Study cohorts.

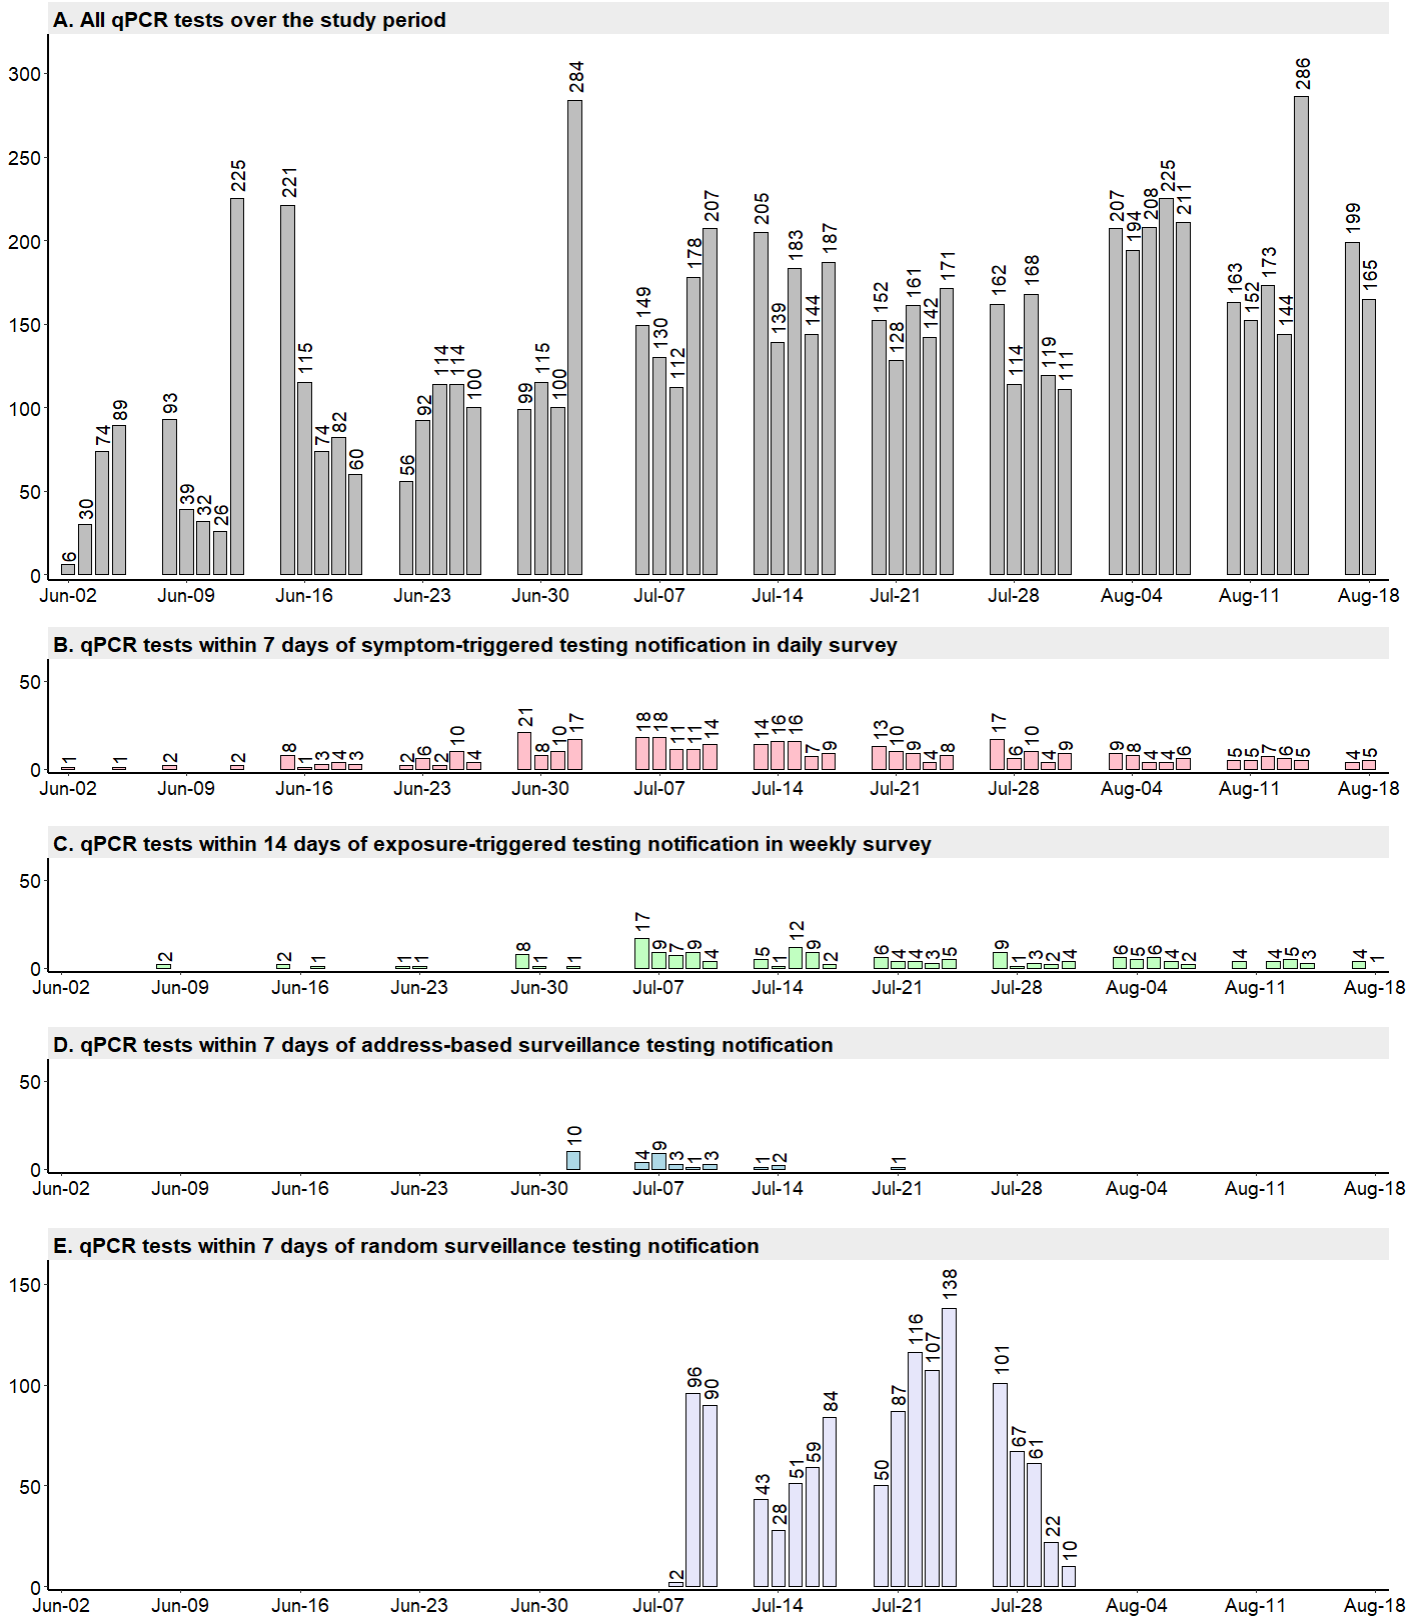

qPCR: quantitative polymerase chain reaction.

Note: Panels are not mutually exclusive.

**STROBE 2007 (v4) Statement—Checklist of items that should be included in reports of cohort studies**

| Section/Topic             | Item # | Recommendation                                                                                                                                                                       | Reported on page #          |
|---------------------------|--------|--------------------------------------------------------------------------------------------------------------------------------------------------------------------------------------|-----------------------------|
| <b>Title and abstract</b> | 1      | (a) Indicate the study’s design with a commonly used term in the title or the abstract                                                                                               | 1-2                         |
|                           |        | (b) Provide in the abstract an informative and balanced summary of what was done and what was found                                                                                  | 2                           |
| <b>Introduction</b>       |        |                                                                                                                                                                                      |                             |
| Background/rationale      | 2      | Explain the scientific background and rationale for the investigation being reported                                                                                                 | 4-5                         |
| Objectives                | 3      | State specific objectives, including any prespecified hypotheses                                                                                                                     | 5                           |
| <b>Methods</b>            |        |                                                                                                                                                                                      |                             |
| Study design              | 4      | Present key elements of study design early in the paper                                                                                                                              | 5                           |
| Setting                   | 5      | Describe the setting, locations, and relevant dates, including periods of recruitment, exposure, follow-up, and data collection                                                      | 5-9, Supplementary Figure 1 |
| Participants              | 6      | (a) Give the eligibility criteria, and the sources and methods of selection of participants. Describe methods of follow-up                                                           | 5-9, Supplementary Table 1  |
|                           |        | (b) For matched studies, give matching criteria and number of exposed and unexposed                                                                                                  | N/A                         |
| Variables                 | 7      | Clearly define all outcomes, exposures, predictors, potential confounders, and effect modifiers. Give diagnostic criteria, if applicable                                             | 6-10                        |
| Data sources/ measurement | 8*     | For each variable of interest, give sources of data and details of methods of assessment (measurement). Describe comparability of assessment methods if there is more than one group | 6-10                        |
| Bias                      | 9      | Describe any efforts to address potential sources of bias                                                                                                                            | 10                          |
| Study size                | 10     | Explain how the study size was arrived at                                                                                                                                            | 6                           |
| Quantitative variables    | 11     | Explain how quantitative variables were handled in the analyses. If applicable, describe which groupings were chosen and why                                                         | 10                          |
| Statistical methods       | 12     | (a) Describe all statistical methods, including those used to control for confounding                                                                                                | 10                          |
|                           |        | (b) Describe any methods used to examine subgroups and interactions                                                                                                                  | N/A                         |
|                           |        | (c) Explain how missing data were addressed                                                                                                                                          | N/A                         |
|                           |        | (d) If applicable, explain how loss to follow-up was addressed                                                                                                                       | N/A                         |
|                           |        | (e) Describe any sensitivity analyses                                                                                                                                                | N/A                         |

|                          |     |                                                                                                                                                                                                              |                        |
|--------------------------|-----|--------------------------------------------------------------------------------------------------------------------------------------------------------------------------------------------------------------|------------------------|
| <b>Results</b>           |     |                                                                                                                                                                                                              |                        |
| Participants             | 13* | (a) Report numbers of individuals at each stage of study—eg numbers potentially eligible, examined for eligibility, confirmed eligible, included in the study, completing follow-up, and analysed            | Supplementary Figure 1 |
|                          |     | (b) Give reasons for non-participation at each stage                                                                                                                                                         | Supplementary Figure 1 |
|                          |     | (c) Consider use of a flow diagram                                                                                                                                                                           | Supplementary Figure 1 |
| Descriptive data         | 14* | (a) Give characteristics of study participants (eg demographic, clinical, social) and information on exposures and potential confounders                                                                     | 11, Table 1            |
|                          |     | (b) Indicate number of participants with missing data for each variable of interest                                                                                                                          | 11-13                  |
|                          |     | (c) Summarise follow-up time (eg, average and total amount)                                                                                                                                                  | 11                     |
| Outcome data             | 15* | Report numbers of outcome events or summary measures over time                                                                                                                                               | 12                     |
| Main results             | 16  | (a) Give unadjusted estimates and, if applicable, confounder-adjusted estimates and their precision (eg, 95% confidence interval). Make clear which confounders were adjusted for and why they were included | 12-14, Tables 2-3      |
|                          |     | (b) Report category boundaries when continuous variables were categorized                                                                                                                                    | 10, Table 3            |
|                          |     | (c) If relevant, consider translating estimates of relative risk into absolute risk for a meaningful time period                                                                                             | N/A                    |
| Other analyses           | 17  | Report other analyses done—eg analyses of subgroups and interactions, and sensitivity analyses                                                                                                               | N/A                    |
| <b>Discussion</b>        |     |                                                                                                                                                                                                              |                        |
| Key results              | 18  | Summarise key results with reference to study objectives                                                                                                                                                     | 14-15                  |
| <b>Limitations</b>       |     |                                                                                                                                                                                                              |                        |
| Interpretation           | 20  | Give a cautious overall interpretation of results considering objectives, limitations, multiplicity of analyses, results from similar studies, and other relevant evidence                                   | 14-17                  |
| Generalisability         | 21  | Discuss the generalisability (external validity) of the study results                                                                                                                                        | 16                     |
| <b>Other information</b> |     |                                                                                                                                                                                                              |                        |
| Funding                  | 22  | Give the source of funding and the role of the funders for the present study and, if applicable, for the original study on which the present article is based                                                | 19                     |

\*Give information separately for cases and controls in case-control studies and, if applicable, for exposed and unexposed groups in cohort and cross-sectional studies.
