# Supplementary material for: Monitoring SARS-CoV-2 incidence and seroconversion among university students and employees: a longitudinal cohort study in California, June–August 2020
Source: PubMed Central journal article supplement — BMJ Open. 2023 Apr 6;13(4):e063999. doi: 10.1136/bmjopen-2022-063999 (PMC10083519; doi:10.1136/bmjopen-2022-063999), 2023-04-06
Supplement: bmjopen-2022-063999supp001.pdf [file bmjopen-2022-063999supp001.pdf]

**Supplementary Table 1.** Eligibility criteria across the Berkeley COVID-19 Safe Campus Study cohorts.

|                             | <b>Student Cohort</b>                                                                                                                      | <b>Essential Worker Cohort</b>                                                                                                                                                                                                                                                                                                                                                   | <b>Faculty/Staff Cohort</b>                                                                                                                              |
|-----------------------------|--------------------------------------------------------------------------------------------------------------------------------------------|----------------------------------------------------------------------------------------------------------------------------------------------------------------------------------------------------------------------------------------------------------------------------------------------------------------------------------------------------------------------------------|----------------------------------------------------------------------------------------------------------------------------------------------------------|
| <b>Eligibility Criteria</b> | - At least 18 years of age                                                                                                                 | - At least 18 years of age                                                                                                                                                                                                                                                                                                                                                       | - At least 18 years of age                                                                                                                               |
|                             | - Currently enrolled as an undergraduate or graduate student at UC Berkeley (i.e., not graduated in Spring 2020 or incoming for Fall 2020) | - Currently employed in one of the following departments at UC Berkeley: health services, police, facility services or other building management, environmental health and safety, laboratory animal care, athletics, dining, childcare, other residential or student services<br>- Currently working on campus at UC Berkeley <i>or</i> expected to return to work in June 2020 | - Currently employed as a faculty member, staff member, or postdoctoral scholar at UC Berkeley<br>- Not already enrolled in the essential workers cohort |
|                             | - Primarily residing in Alameda County or Contra Costa Country between 6/1/20-8/31/20                                                      | N/A                                                                                                                                                                                                                                                                                                                                                                              | - Primarily residing in Alameda County or Contra Costa Country between 6/1/20-8/31/20                                                                    |
|                             | - Willing to sign release of information for COVID-19-related medical records                                                              | - Willing to sign release of information for COVID-19-related medical records                                                                                                                                                                                                                                                                                                    | - Willing to sign release of information for COVID-19-related medical records                                                                            |

**Supplementary Figure 1.** Flow diagram for the Berkeley COVID-19 Safe Campus Study cohorts.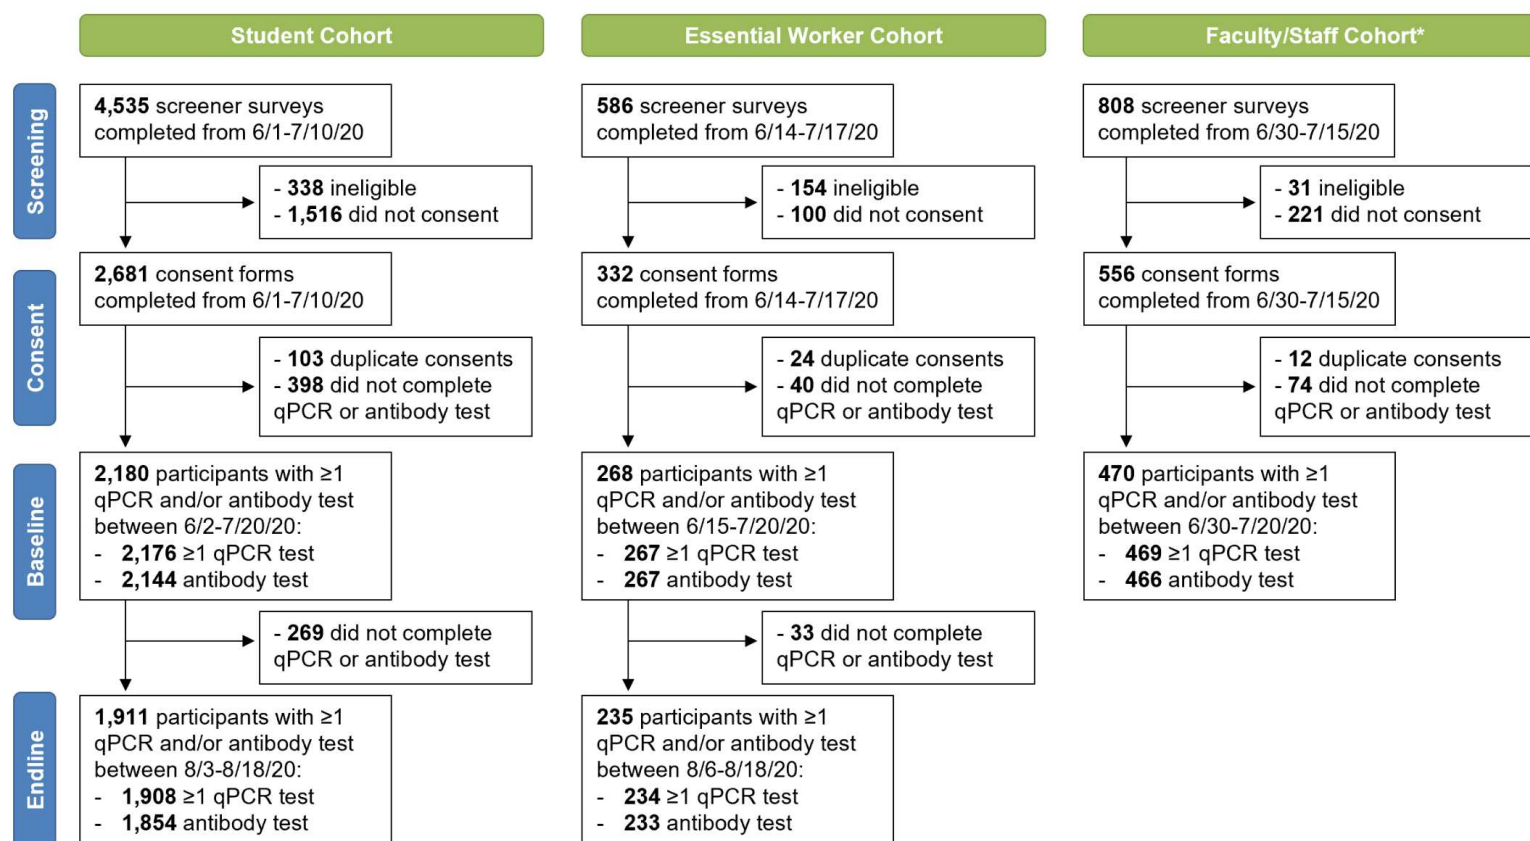

qPCR: quantitative polymerase chain reaction.

\*Faculty/staff cohort not invited for endline testing appointments but could complete follow-up qPCR tests through 8/18/20.

**Supplementary Figure 2.** qPCR testing over time in the Berkeley COVID-19 Safe Campus Study cohorts.

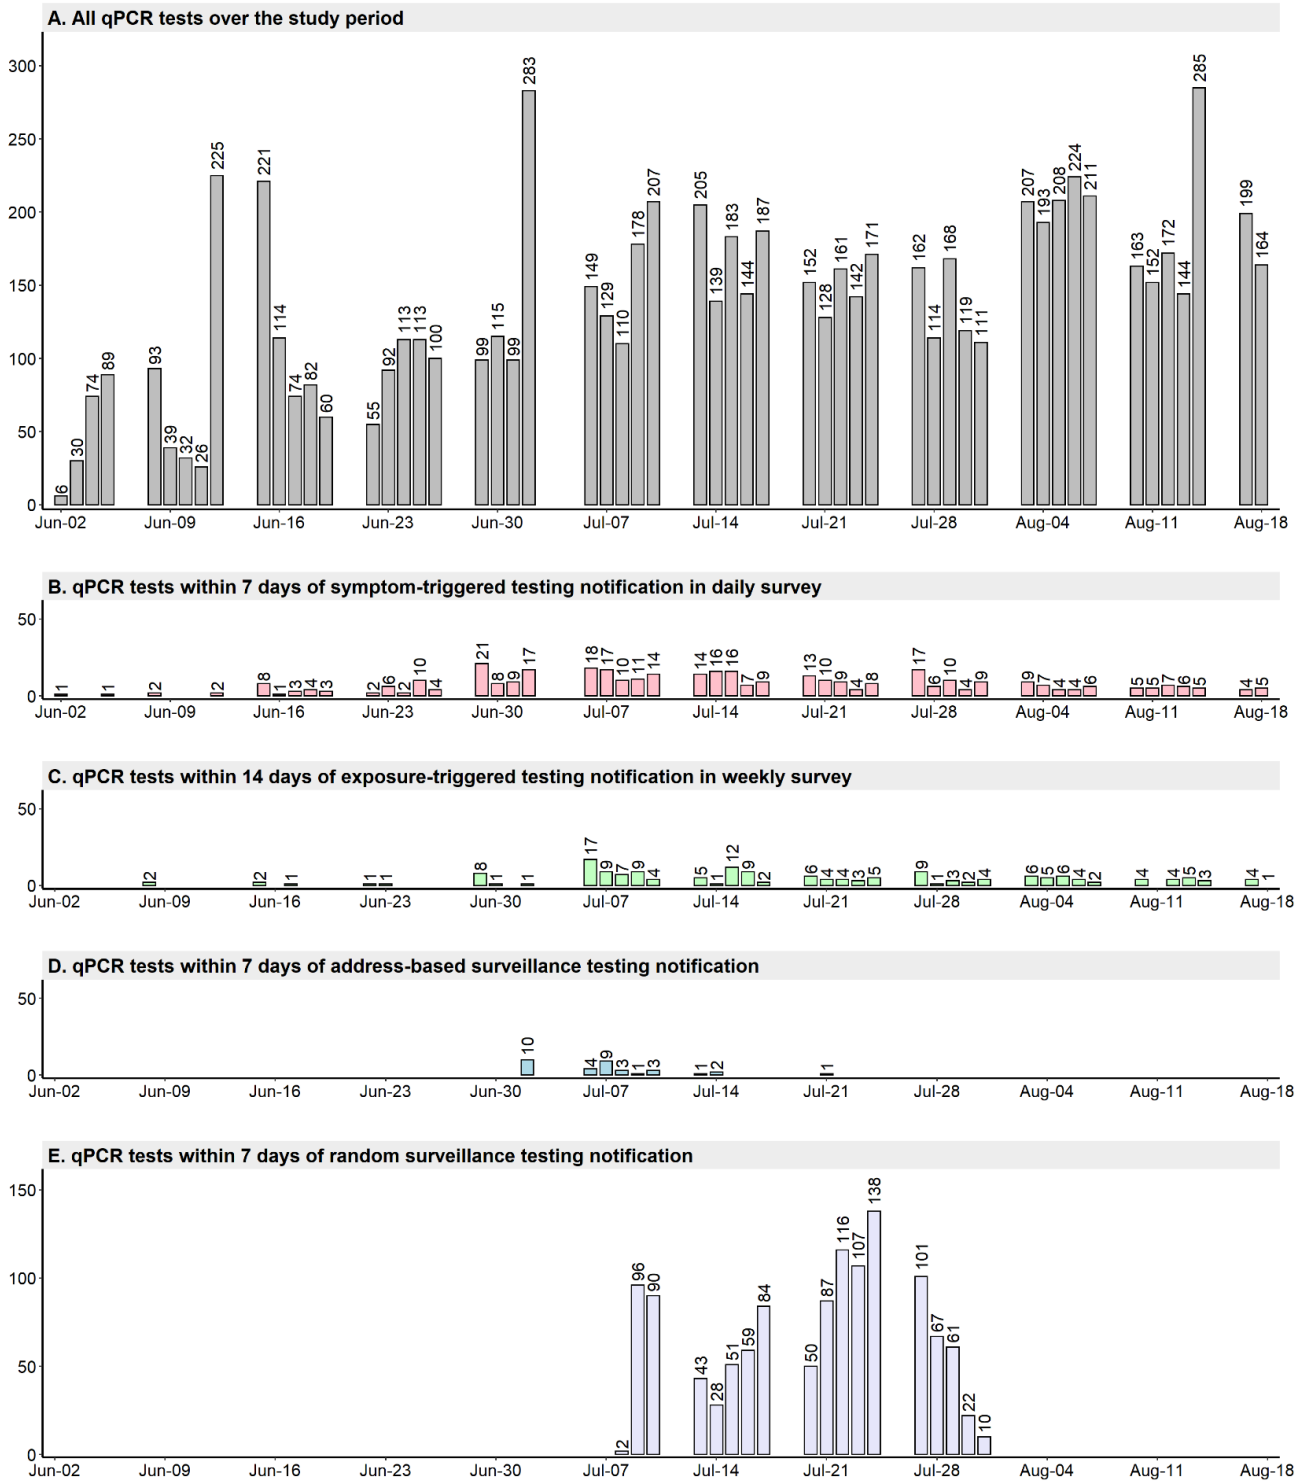

qPCR: quantitative polymerase chain reaction.  
 Note: Panels are not mutually exclusive.
